# Supplementary material for: Antimony centre in three different roles: does donor strength or acceptor ability determine the bonding pattern?
Source: Royal Society of Chemistry journal article supplement (doi:10.1039/d4dt02787f), 2024-01-01
Supplement: d4dt02787f1.pdf [file d4dt02787f1.pdf]

ESI for:

**Antimony centre in three different roles: Donor strength or acceptor ability determines the bonding pattern?**

Richard Chlebík, Csilla Fekete, Roman Jambor, Aleš Růžička, Zoltán Benkő\* and Libor

Dostál\*

\*E-mails: [libor.dostal@upce.cz](mailto:libor.dostal@upce.cz), [benko.zoltan@vbk.bme.hu](mailto:benko.zoltan@vbk.bme.hu)

**Table of contents:**

|                                     |         |
|-------------------------------------|---------|
| 1) General procedures               | S2      |
| 2) Syntheses                        | S3-S6   |
| 3) NMR spectra of studied compounds | S7-S15  |
| 4) Crystallography                  | S16-S19 |
| 5) Theoretical study                | S20-S66 |
| 6) References                       | S67     |

## 1) General procedures.

All manipulations were carried out under an argon atmosphere using standard Schlenk tube technique. Solvents were dried using Pure Solv–Innovative Technology equipment.  $C_6D_6$ ,  $CD_2Cl_2$  and  $CDCl_3$  were dried by standard procedures and stored over potassium mirror (benzene) or molecular sieves, respectively. Precursors of the ligand ArBr was synthesized according to literature.<sup>17</sup> All reagents other reagents were purchased from commercial sources and used as delivered.  $^1H$  and  $^{13}C\{^1H\}$  NMR spectra were recorded on Bruker Ascend 500 MHz and Bruker Ultrashield 400 MHz spectrometers, using a 5 mm tunable broad-band probe or a cryo-probe Prodigy. Appropriate chemical shifts in  $^1H$  and  $^{13}C\{^1H\}$  NMR spectra are given relative to the residual signals of the solvent [ $C_6D_6$ :  $\delta(^1H) = 7.16$  ppm and  $\delta(^{13}C) = 138.9$  ppm,  $CD_2Cl_2$ :  $\delta(^1H) = 5.32$  ppm and  $\delta(^{13}C) = 54.00$  ppm,  $CDCl_3$ :  $\delta(^1H) = 7.27$  ppm and  $\delta(^{13}C) = 77.23$  ppm.] Elemental analyses were performed on an LECO-CHNS-932 analyser.

## 2) Syntheses.

### Preparation of [2-(Me<sub>2</sub>N)<sub>2</sub>C=NC<sub>6</sub>H<sub>4</sub>]SbCl<sub>2</sub> - ArSbCl<sub>2</sub>.

A sample 415 mg of ArLi<sup>Si</sup> (2.1 mmol) dissolved in toluene (20 mL) was added to a solution of SbCl<sub>3</sub> 480 mg (2.1 mmol) in toluene (20 mL) at 0 °C. The temperature was kept at this temperature for 30 min and then gradually warmed to r.t. and stirred overnight. The resulting mixture was filtered and the filtrate was concentrated and stored at -30°C. Colorless crystals of **ArSbCl<sub>2</sub>** were obtained in a period of several days that were collected by filtration and dried *in vacuo*. Single-crystals suitable for X-ray diffraction analysis could be obtained by re-crystallization from saturated dichloromethane solution layered with hexane. Yield: 393 mg, (49 %), m. p. 143°C. Anal. Calcd for C<sub>11</sub>H<sub>16</sub>Cl<sub>2</sub>N<sub>3</sub>Sb (MW 382.93): C 34.5; H 4.2; N 11.0 % Found: C, 34.6; H, 4.4; N 11.2%. <sup>1</sup>H NMR (500 MHz, C<sub>6</sub>D<sub>6</sub>) δ (ppm): 2.21 [12H, s(br), CH<sub>3</sub>]; 6.29 [1H, d, <sup>3</sup>J(<sup>1</sup>H,<sup>1</sup>H) = 7.8 Hz, Ar-H]; 7.02 [1H, t, <sup>3</sup>J(<sup>1</sup>H,<sup>1</sup>H) = 7.3 Hz, Ar-H]; 7.22 [1H, t, <sup>3</sup>J(<sup>1</sup>H,<sup>1</sup>H) = 7.3 Hz, Ar-H]; 8.35 [1H, d, <sup>3</sup>J(<sup>1</sup>H,<sup>1</sup>H) = 7.3 Hz, Ar-H]. <sup>13</sup>C{<sup>1</sup>H} NMR (125.76 MHz, C<sub>6</sub>D<sub>6</sub>) δ (ppm): 39.5 [CH<sub>3</sub>]; 118.4 [Ar-CH]; 123.1 [Ar-CH]; 132.1 [Ar-CH]; 132.7 [Ar-CH]; 146.8 [Ar-C]; 155.2 [Ar-C]; 159.2 [C=N].

### Preparation of {[2-(Me<sub>2</sub>N)<sub>2</sub>C=NC<sub>6</sub>H<sub>4</sub>]}<sub>2</sub>SbCl - Ar<sub>2</sub>SbCl.

A sample 1.874 g of ArLi<sup>Si</sup> (9.5 mmol) dissolved in toluene (20 mL) was added to a solution of SbCl<sub>3</sub> 1.084 g (4.75 mmol) in toluene (20 mL) at 0 °C. The temperature was kept at this temperature for 30 min and then gradually warmed to r.t. and stirred overnight. The resulting mixture was filtered and the filtrate was concentrated to *ca.* 5 mL and layered by hexane. Storage of this mixture resulted in the formation of colorless crystals of **Ar<sub>2</sub>SbCl** within 24 h. These crystals were collected by filtration and dried *in vacuo*. Single-crystals suitable for X-ray diffraction analysis could be obtained by re-crystallization from saturated benzene solution layered with hexane. Yield: 1.47 g, (58 %), m. p. 173°C. Anal. Calcd for C<sub>22</sub>H<sub>32</sub>ClN<sub>6</sub>Sb (MW 537.75): C 49.1; H 6.0; N 15.6 % Found: C, 49.5; H, 6.3; N 15.2%. <sup>1</sup>H NMR (500 MHz, C<sub>6</sub>D<sub>6</sub>)

$\delta$  (ppm): 2.33 [12H, s(br),  $CH_3$ ]; 6.46 [1H, d,  $^3J(^1H, ^1H) = 7.8$  Hz, Ar- $H$ ]; 6.96 [1H, t,  $^3J(^1H, ^1H) = 7.5$  Hz, Ar- $H$ ]; 7.22 [1H, t,  $^3J(^1H, ^1H) = 7.6$  Hz, Ar- $H$ ]; 8.19 [1H, d,  $^3J(^1H, ^1H) = 7.4$  Hz, Ar- $H$ ].  $^{13}C\{^1H\}$  NMR (125.76 MHz,  $C_6D_6$ )  $\delta$  (ppm): 39.7 [ $CH_3$ ]; 118.9 [Ar-CH]; 122.4 [Ar-CH]; 129.9 [Ar-CH]; 135.3 [Ar-CH]; 142.2 [Ar-C]; 155.3 [Ar-C]; 158.9 [C=N].

#### Preparation of $\{[2-(Me_2N)_2C=NC_6H_4]\}_3Sb - Ar_3Sb$ .

A sample 1.20 g of  $ArLi^{S1}$  (6.09 mmol) dissolved in toluene (20 mL) was added to a solution of  $SbCl_3$  421 mg (1.85 mmol) in toluene (20 mL) at 0 °C. The temperature was kept at this temperature for 30 min and then gradually warmed to r.t. and stirred for 6 days. The resulting mixture was filtered and the filtrate was evaporated. The resulting solid was washed with hexane (15 mL) and dried *in vacuo* to give  $Ar_3Sb$  as white powder. Single-crystals suitable for X-ray diffraction analysis could be obtained by crystallization from saturated hexane solution at -30°C. Yield: 858 mg, (67 %), m. p. 148°C. Anal. Calcd for  $C_{33}H_{48}N_9Sb$  (MW 692.57): C 57.2; H 7.0; N 18.2 % Found: C, 57.6; H, 7.3; N 18.3%.  $^1H$  NMR (500 MHz,  $C_6D_6$ )  $\delta$  (ppm): 2.42 [12H, s,  $CH_3$ ]; 6.67 [1H, d,  $^3J(^1H, ^1H) = 7.8$  Hz, Ar- $H$ ]; 6.86 [1H, t,  $^3J(^1H, ^1H) = 7.3$  Hz, Ar- $H$ ]; 7.24 [1H, t,  $^3J(^1H, ^1H) = 7.2$  Hz, Ar- $H$ ]; 7.77 [1H, d,  $^3J(^1H, ^1H) = 7.4$  Hz, Ar- $H$ ].  $^{13}C\{^1H\}$  NMR (125.76 MHz,  $C_6D_6$ )  $\delta$  (ppm): 40.0 [ $CH_3$ ]; 119.8 [Ar-CH]; 121.3 [Ar-CH]; 128.8 [Ar-CH]; 136.4 [Ar-C]; 138.4 [Ar-CH]; 156.9 [Ar-C]; 157.6 [C=N].

#### Preparation of $[Ar_3SbPdCl_2]$ – complex 1.

A sample 218 mg of  $Ar_3Sb$  (0.31 mmol) and 82 mg of *cis*- $[PdCl_2(CH_3CN)_2]$  (0.31 mmol) was dissolved in dichloromethane (10 mL) and stirred for 1 h. The resulting mixture was filtered and the filtrate was concentrated and layered with hexane. Storage of this mixture at -30°C provided orange-brown single-crystals of **1** that were collected by decantation, washed with hexane and dried *in vacuo*. Yield: 226 mg, (82 %), m. p. 149°C. Anal. Calcd for  $C_{33}H_{48}Cl_2N_9PdSb$  (MW 869.89): C 45.6; H 5.6; N 14.5 % Found: C, 45.9; H, 5.7; N 14.2%.  $^1H$  NMR (500 MHz,  $CDCl_3$ )  $\delta$  (ppm): 2.61 [24H, s,  $CH_3$ ]; 3.03 [12H, s,  $CH_3$ ]; 6.22 [1H, d,

$^3J(^1H, ^1H) = 8.1$  Hz, Ar-*H*]; 6.47 [2H, d,  $^3J(^1H, ^1H) = 8.1$  Hz, Ar-*H*]; 6.64 [1H, t,  $^3J(^1H, ^1H) = 7.5$  Hz, Ar-*H*]; 6.74 [2H, t,  $^3J(^1H, ^1H) = 7.5$  Hz, Ar-*H*]; 7.12 [1H, m, Ar-*H*]; 7.25 [2H, m, Ar-*H*]; 7.36 [2H, d(br), Ar-*H*]; 7.70 [1H, d(br), Ar-*H*].  $^{13}C\{^1H\}$  NMR (125.76 MHz,  $CDCl_3$ )  $\delta$  (ppm): 40.0 [ $CH_3$ ]; 40.4 [ $CH_3$ ]; 41.7 [ $CH_3$ ]; 114.6 [Ar-CH]; 118.8 [Ar-CH]; 118.9 [Ar-CH]; 120.0 [Ar-CH]; 128.5 [Ar-C]; 129.1 [Ar-C]; 130.5 [Ar-CH]; 130.9 [Ar-CH]; 135.3 [Ar-CH]; 136.9 [Ar-CH]; 153.6 [Ar-C]; 155.1 [Ar-C]; 159.4 [C=N]; 168.9 [C=N].

### Preparation of $[Ar_3SbPtCl_2]$ – complex 2.

A sample 160 mg of  $Ar_3Sb$  (0.23 mmol) and 61mg of  $PtCl_2$  (0.23 mmol) was suspended in dichloromethane (10 mL) and stirred for 3 h and during this period  $PtCl_2$  dissolved. The resulting mixture was filtered and the filtrate was concentrated and layered with hexane. Storage of this mixture at  $-30^\circ C$  provided orange single-crystals of **2** that were collected by decantation, washed with hexane and dried *in vacuo*. Yield: 158 mg, (72 %), m. p.  $140^\circ C$ . Anal. Calcd for  $C_{33}H_{48}Cl_2N_9PtSb$  (MW 985.55): C 41.4; H 5.1; N 13.2 % Found: C, 41.6; H, 5.5; N 13.5%.  $^1H$  NMR (500 MHz,  $CD_2Cl_2$ )  $\delta$  (ppm): 2.54 [24H, s,  $CH_3$ ]; 2.88 [12H, s,  $CH_3$ ]; 3.07 [12H, s,  $CH_3$ ]; 6.20 [1H, d,  $^3J(^1H, ^1H) = 8.4$  Hz, Ar-*H*]; 6.40 [2H, d,  $^3J(^1H, ^1H) = 8.0$  Hz, Ar-*H*]; 6.63 [1H, t,  $^3J(^1H, ^1H) = 7.1$  Hz, Ar-*H*]; 6.75 [2H, t,  $^3J(^1H, ^1H) = 7.1$  Hz, Ar-*H*]; 7.07 [1H, t,  $^3J(^1H, ^1H) = 7.5$  Hz, Ar-*H*]; 7.20 [2H, t,  $^3J(^1H, ^1H) = 7.5$  Hz, Ar-*H*]; 7.45 [2H, d,  $^3J(^1H, ^1H) = 6.4$  Hz, Ar-*H*]; 8.22 [1H, d,  $^3J(^1H, ^1H) = 5.5$  Hz, Ar-*H*].  $^{13}C\{^1H\}$  NMR (125.76 MHz,  $CD_2Cl_2$ )  $\delta$  (ppm): 40.0 [ $CH_3$ ]; 40.1 [ $CH_3$ ]; 42.0 [ $CH_3$ ]; 113.9 [Ar-CH]; 119.2 [Ar-CH]; 119.6 [Ar-CH]; 120.1 [Ar-CH]; 126.3 [Ar-C]; 127.4 [Ar-C]; 131.0 [Ar-CH]; 131.2 [Ar-CH]; 135.3 [Ar-CH]; 138.4 [Ar-CH]; 155.5 [Ar-C]; 155.8 [Ar-C]; 159.9 [C=N]; 169.6 [C=N].

### Preparation of $[Ar_2SbClPdCl_2]$ – complex 3.

A sample 136 mg of  $Ar_2SbCl$  (0.25 mmol) and 66 mg of *cis*- $[PdCl_2(CH_3CN)_2]$  (0.25 mmol) was dissolved in acetonitrile (15 mL) and stirred for 1 h. During this period, a red precipitate formed that was isolated by filtration and dried *in vacuo* to give **3**. Single-crystals suitable for

X-ray diffraction analysis could be obtained by storing the mother liquor for several hours at r.t.. Yield: 149 mg, (83 %), m. p. 188°C. Anal. Calcd for C<sub>22</sub>H<sub>32</sub>Cl<sub>3</sub>N<sub>6</sub>PdSb (MW 715.07): C 37.0; H 4.5; N 11.8 % Found: C, 37.2; H, 4.1; N 11.4%. <sup>1</sup>H NMR (500 MHz, CD<sub>2</sub>Cl<sub>2</sub>) δ (ppm): 0.83 [3H, s, CH<sub>3</sub>]; 2.20 [3H, s, CH<sub>3</sub>]; 2.48 [3H, s, CH<sub>3</sub>]; 2.61 [3H, s, CH<sub>3</sub>]; 2.86 [3H, s, CH<sub>3</sub>]; 2.96 [3H, s, CH<sub>3</sub>]; 3.74 [3H, s, CH<sub>3</sub>]; 3.75 [3H, s, CH<sub>3</sub>]; 6.15 [1H, d, <sup>3</sup>J(<sup>1</sup>H,<sup>1</sup>H) = 7.5 Hz, Ar-H]; 6.26 [1H, d, <sup>3</sup>J(<sup>1</sup>H,<sup>1</sup>H) = 7.8 Hz, Ar-H]; 7.00 [1H, t, <sup>3</sup>J(<sup>1</sup>H,<sup>1</sup>H) = 7.2 Hz, Ar-H]; 7.08 [3H, m, Ar-H]; 8.12 [1H, d, <sup>3</sup>J(<sup>1</sup>H,<sup>1</sup>H) = 7.1 Hz, Ar-H]; 8.17 [2H, d, <sup>3</sup>J(<sup>1</sup>H,<sup>1</sup>H) = 7.3 Hz, Ar-H]. <sup>13</sup>C{<sup>1</sup>H} NMR (125.76 MHz, CD<sub>2</sub>Cl<sub>2</sub>) δ (ppm): 37.5 [CH<sub>3</sub>]; 39.6 [CH<sub>3</sub>]; 39.9 [CH<sub>3</sub>]; 40.5 [CH<sub>3</sub>]; 42.1 [CH<sub>3</sub>]; 42.5 [CH<sub>3</sub>]; 42.8 [CH<sub>3</sub>]; 123.9 [Ar-CH]; 123.9 [Ar-CH]; 124.2 [Ar-CH]; 124.8 [Ar-CH]; 129.2 [Ar-CH]; 130.3 [Ar-CH]; 135.3 [Ar-CH]; 135.5 [Ar-CH]; 138.4 [Ar-C]; 139.4 [Ar-C]; 154.9 [Ar-C]; 155.9 [Ar-C]; 165.9 [C=N]; 169.9 [C=N].

#### **Preparation of [Ar<sub>2</sub>SbClPtCl<sub>2</sub>] – complex 4.**

A sample 136 mg of Ar<sub>2</sub>SbCl (0.25 mmol) and 67 mg of PtCl<sub>2</sub> (0.25 mmol) was dissolved in chloroform (15 mL) and heated to 60 °C for 1h giving orange solution. The mixture was filtered when still hot and slow cooling of the filtrate provided yellow single-crystals of **4** that was isolated by filtration and dried *in vacuo* Yield: 84 mg, (42 %), m. p. 230°C. Anal. Calcd for C<sub>22</sub>H<sub>32</sub>Cl<sub>3</sub>N<sub>6</sub>PtSb (MW 803.73): C 32.9; H 4.0; N 10.5 % Found: C, 33.2; H, 4.2; N 10.2%.

### 3) NMR spectra of studied compounds.

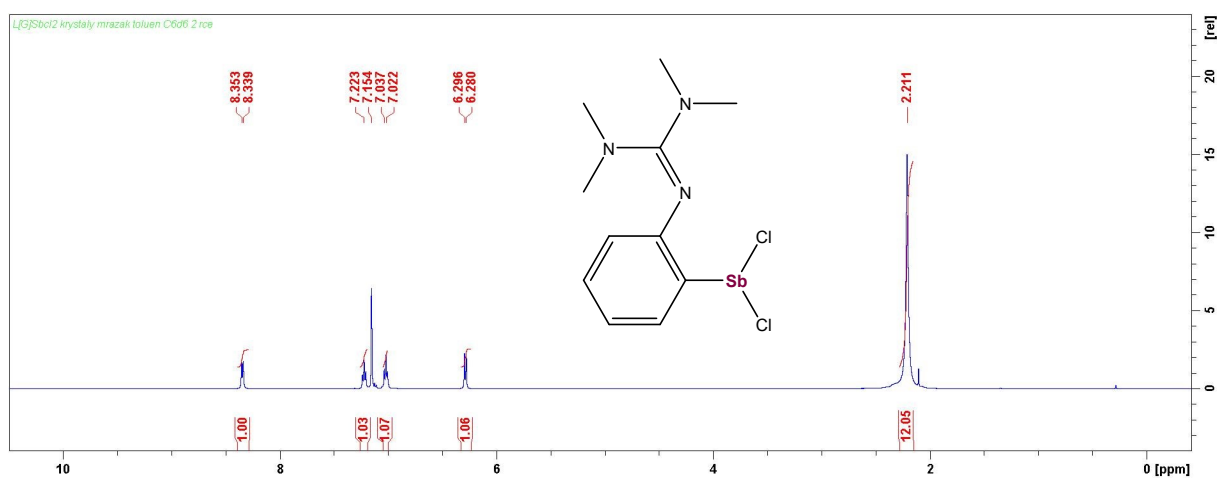

**Figure S1:** <sup>1</sup>H NMR spectrum of ArSbCl<sub>2</sub> in C<sub>6</sub>D<sub>6</sub> (500 MHz).

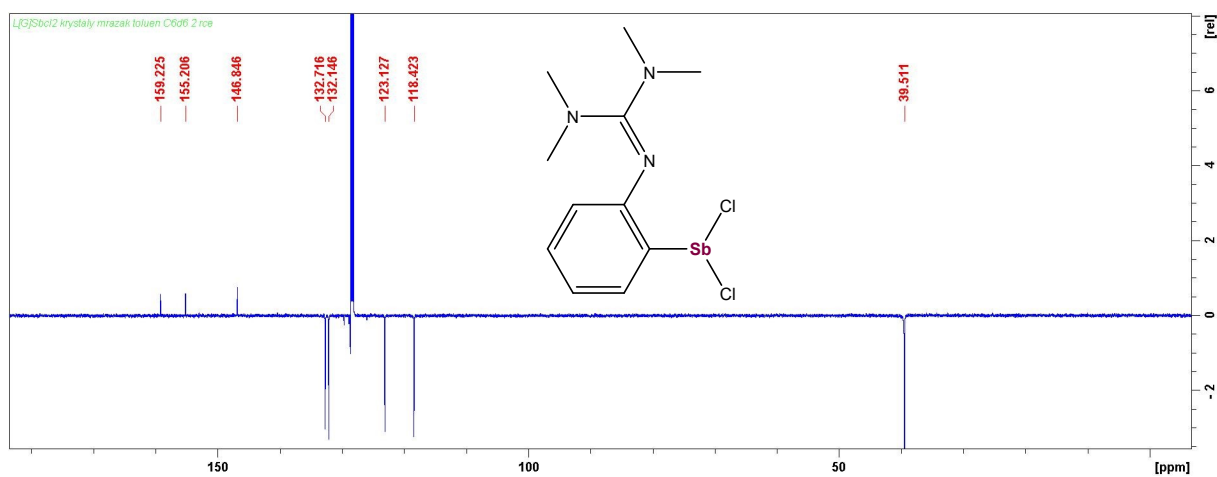

**Figure S2:** <sup>13</sup>C{<sup>1</sup>H} NMR spectrum of ArSbCl<sub>2</sub> in C<sub>6</sub>D<sub>6</sub> (125.6 MHz).

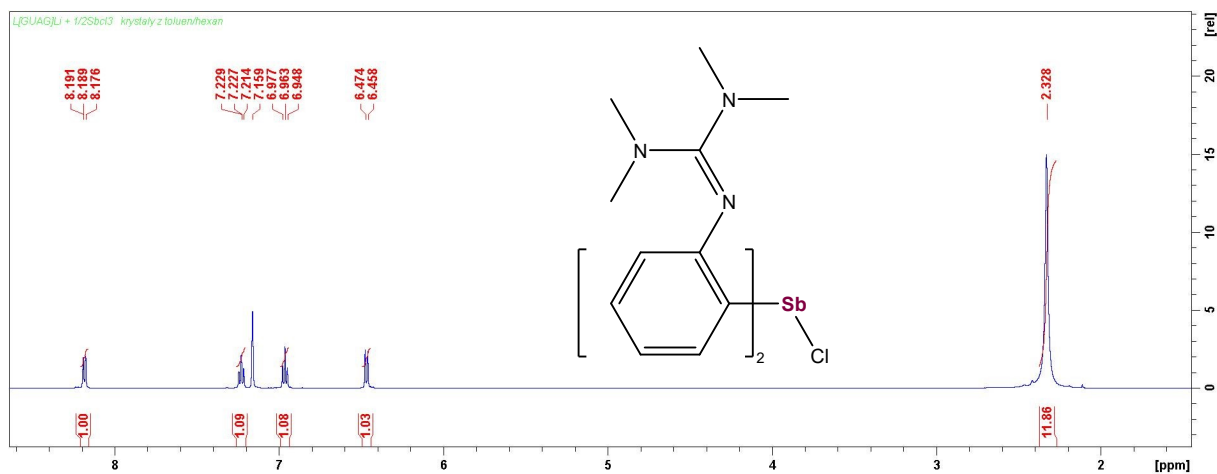

**Figure S3:**  $^1\text{H}$  NMR spectrum of  $\text{Ar}_2\text{SbCl}$  in  $\text{C}_6\text{D}_6$  (500 MHz).

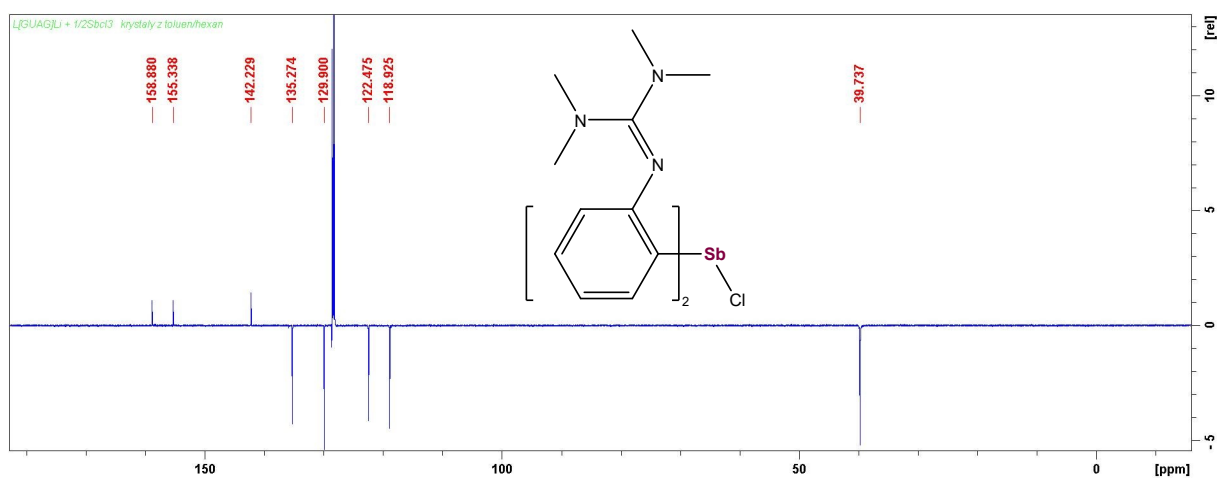

**Figure S4:**  $^{13}\text{C}\{^1\text{H}\}$  NMR spectrum of  $\text{Ar}_2\text{SbCl}$  in  $\text{C}_6\text{D}_6$  (125.6 MHz).

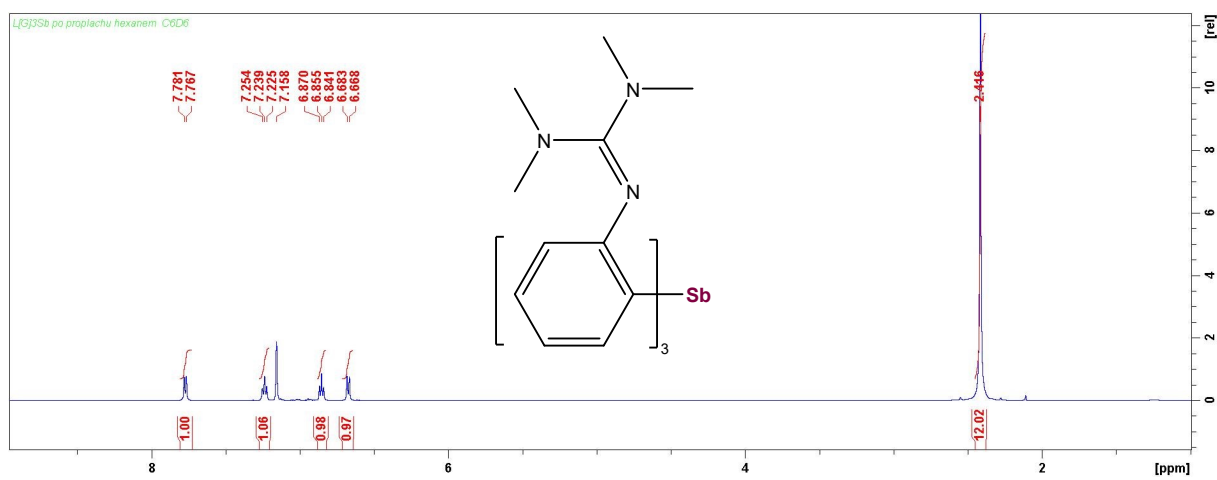

**Figure S5:**  $^1\text{H}$  NMR spectrum of  $\text{Ar}_3\text{Sb}$  in  $\text{C}_6\text{D}_6$  (500 MHz).



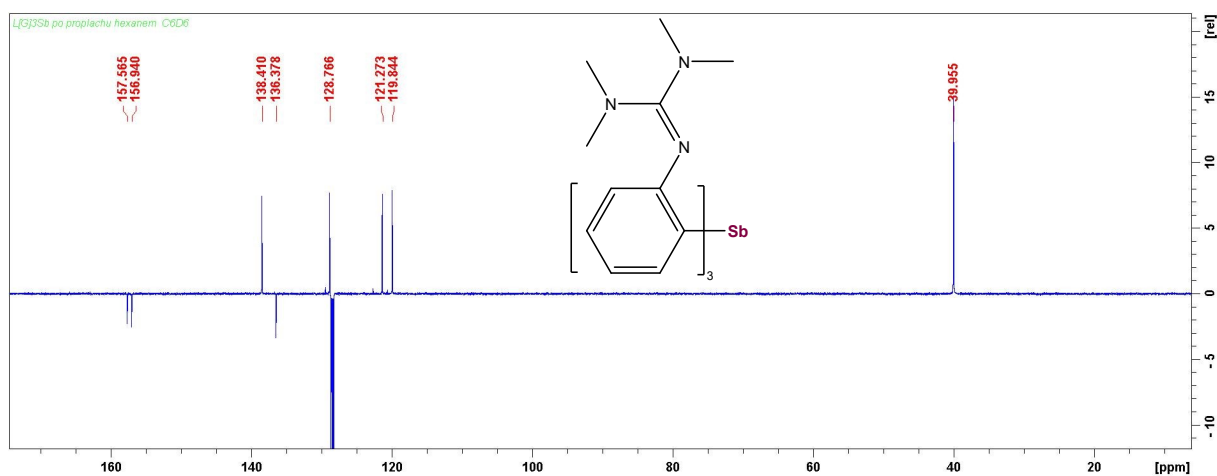

**Figure S6:**  $^{13}\text{C}\{^1\text{H}\}$  NMR spectrum of  $\text{Ar}_3\text{Sb}$  in  $\text{C}_6\text{D}_6$  (125.6 MHz).

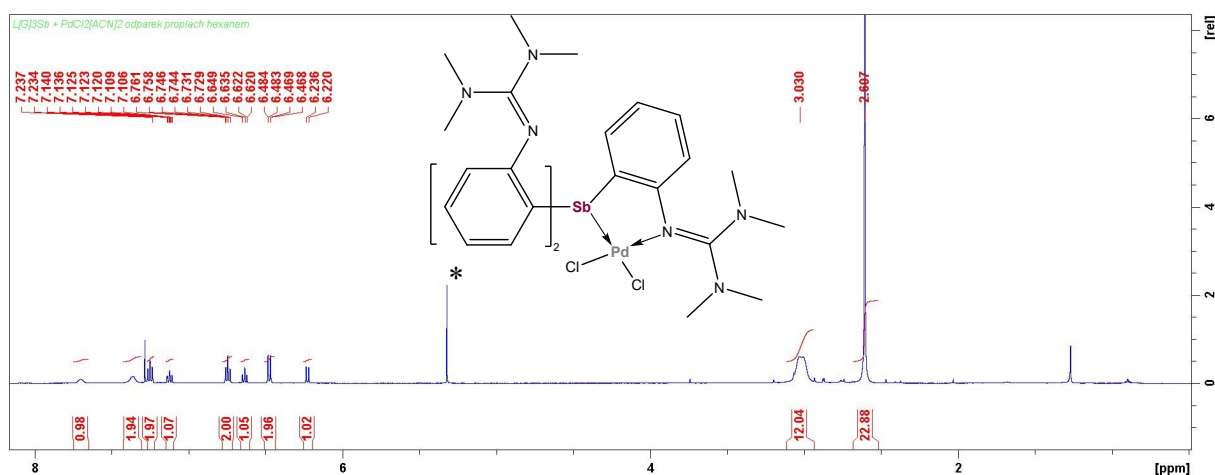

**Figure S7:**  $^1\text{H}$  NMR spectrum of complex **1** in  $\text{CDCl}_3$  (500 MHz). \*denotes residual signal of co-crystallized dichloromethane.

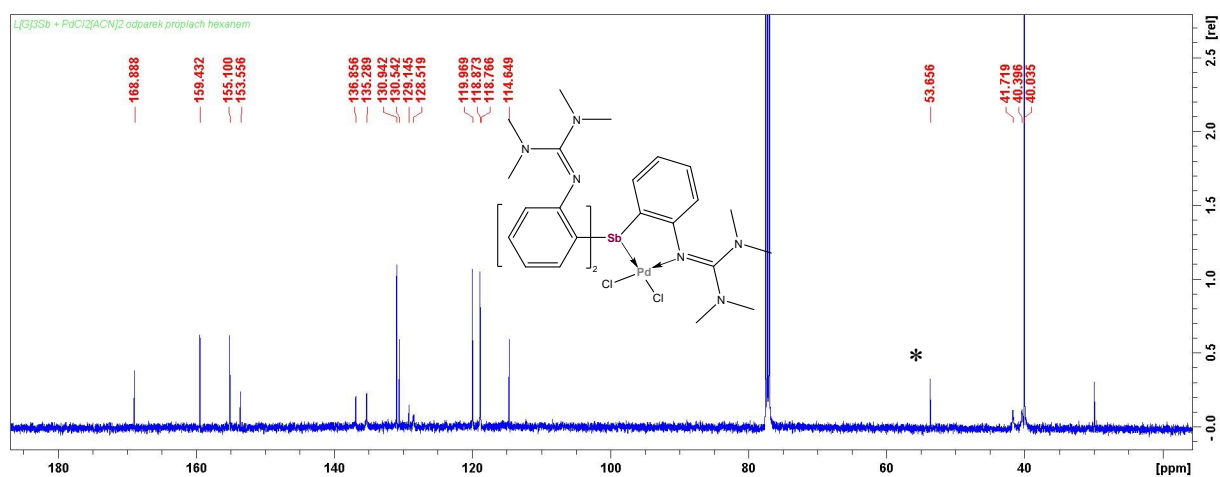

**Figure S8:**  $^{13}\text{C}\{^1\text{H}\}$  NMR spectrum of complex **1** in  $\text{CDCl}_3$  (125.6 MHz). \*denotes residual signal of co-crystallized dichloromethane.

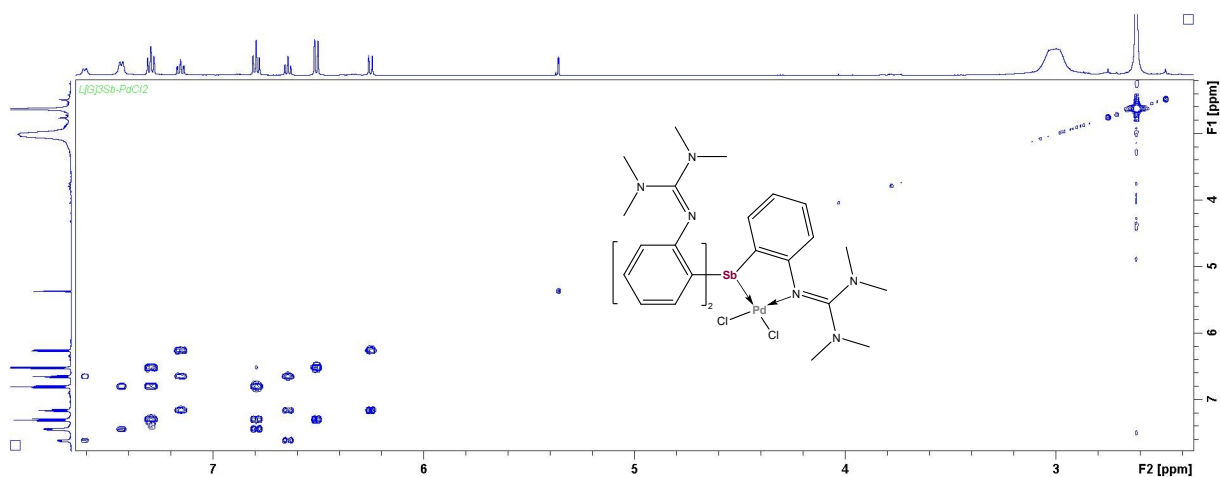

**Figure S9:**  $^1\text{H}$ - $^1\text{H}$  COSY NMR spectrum of complex **1** in  $\text{CD}_2\text{Cl}_2$  (500 MHz).

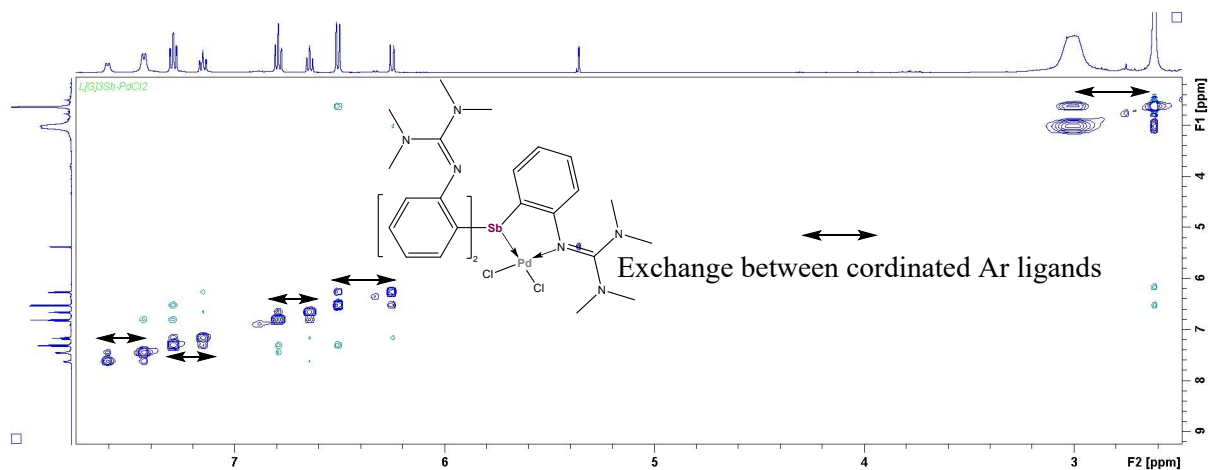

**Figure S10:**  $^1\text{H}$ - $^1\text{H}$  EXSY NMR spectrum of complex **1** in  $\text{CD}_2\text{Cl}_2$  (mixing time 1s, 500 MHz).

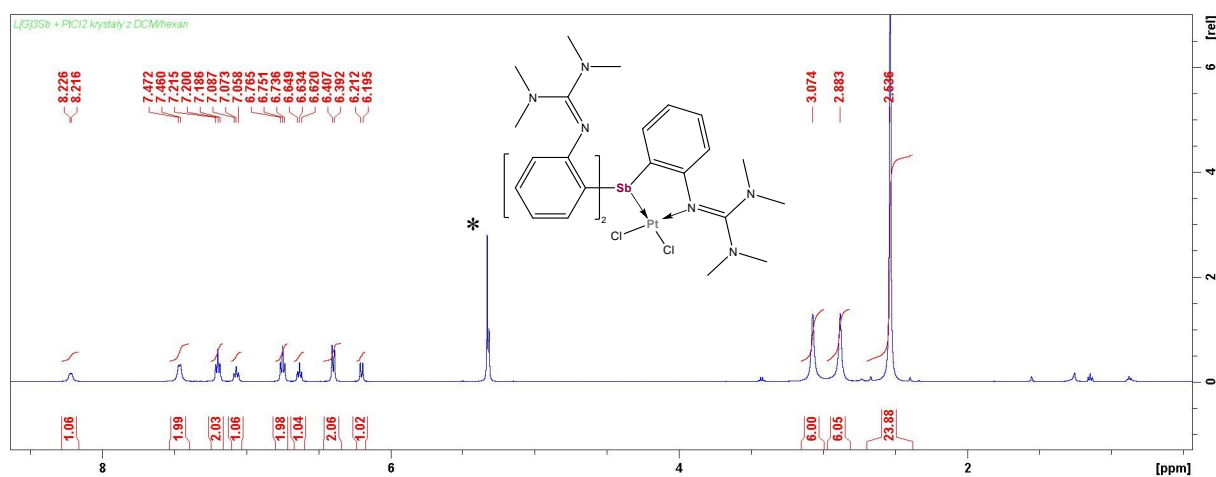

**Figure S11:**  $^1\text{H}$  NMR spectrum of complex **2** in  $\text{CD}_2\text{Cl}_2$  (500 MHz). \*denotes residual signal of co-crystallized dichloromethane.

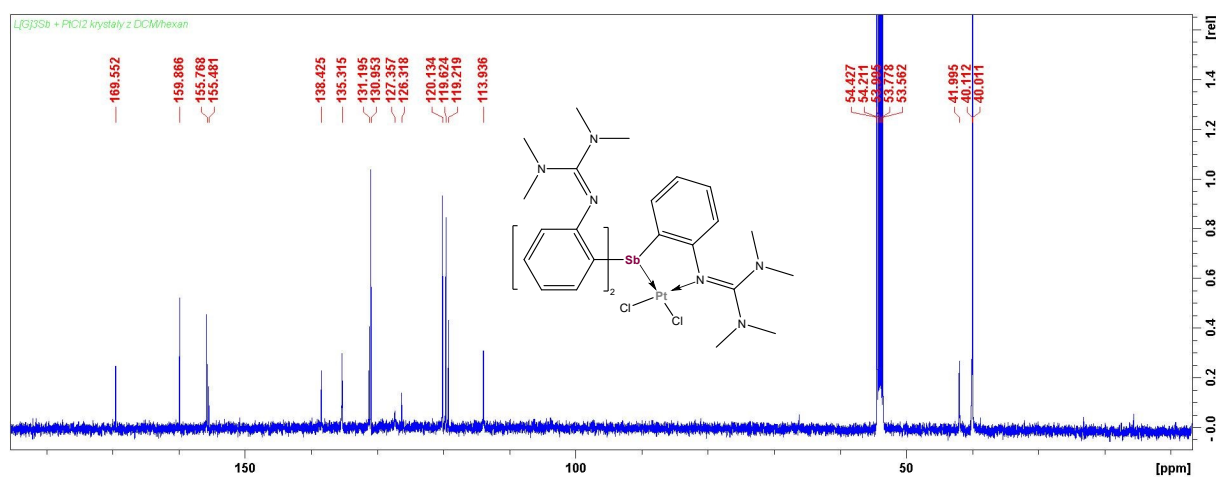

**Figure S12:**  $^{13}\text{C}\{^1\text{H}\}$  NMR spectrum of complex 2 in  $\text{CD}_2\text{Cl}_2$  (125.6 MHz).

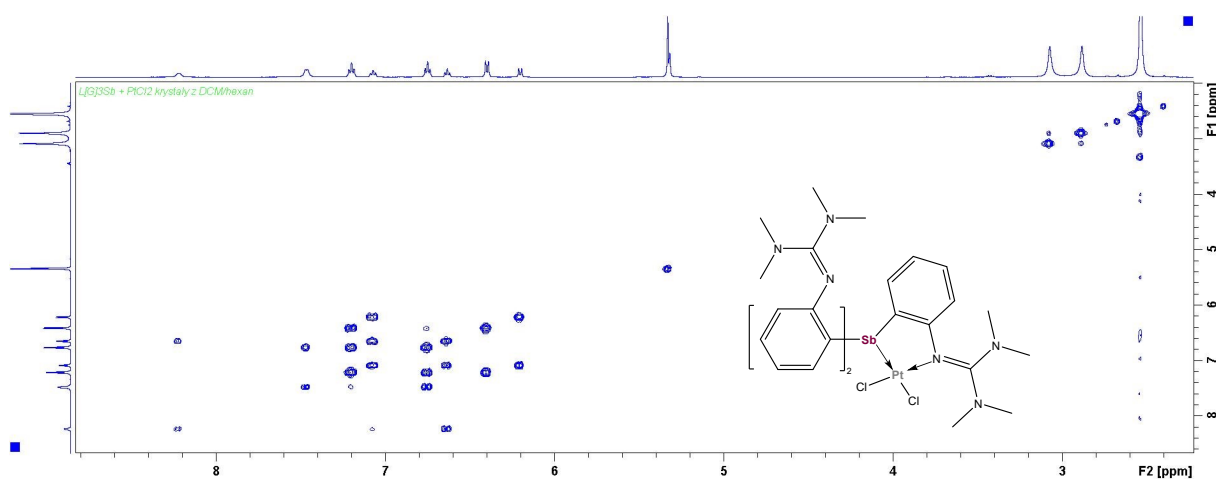

**Figure S13:**  $^1\text{H}$ - $^1\text{H}$  COSY NMR spectrum of complex 2 in  $\text{CD}_2\text{Cl}_2$  (500 MHz).

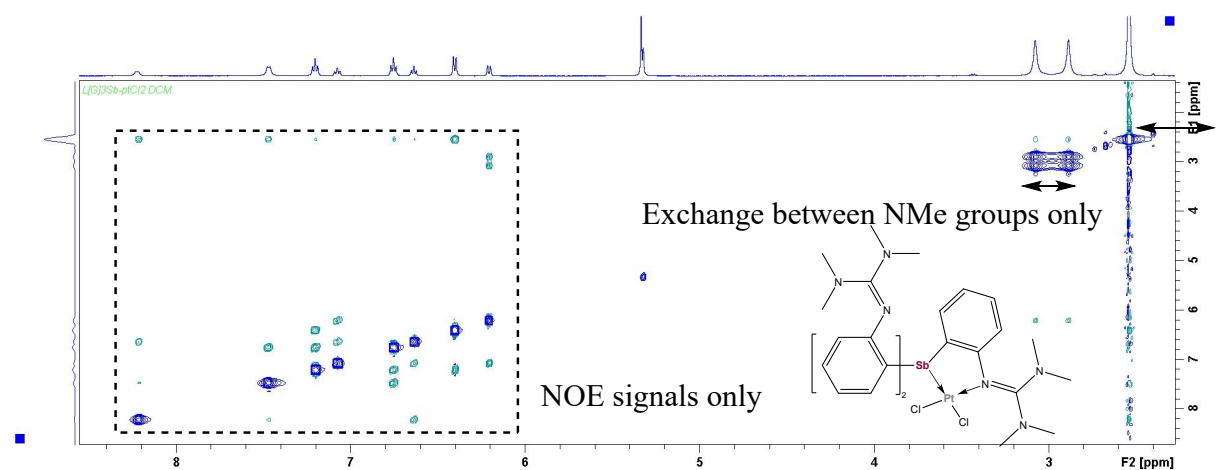

**Figure S14:**  $^1\text{H}$ - $^1\text{H}$  EXSY NMR spectrum of complex 2 in  $\text{CD}_2\text{Cl}_2$  (mixing time 1s, 500 MHz).

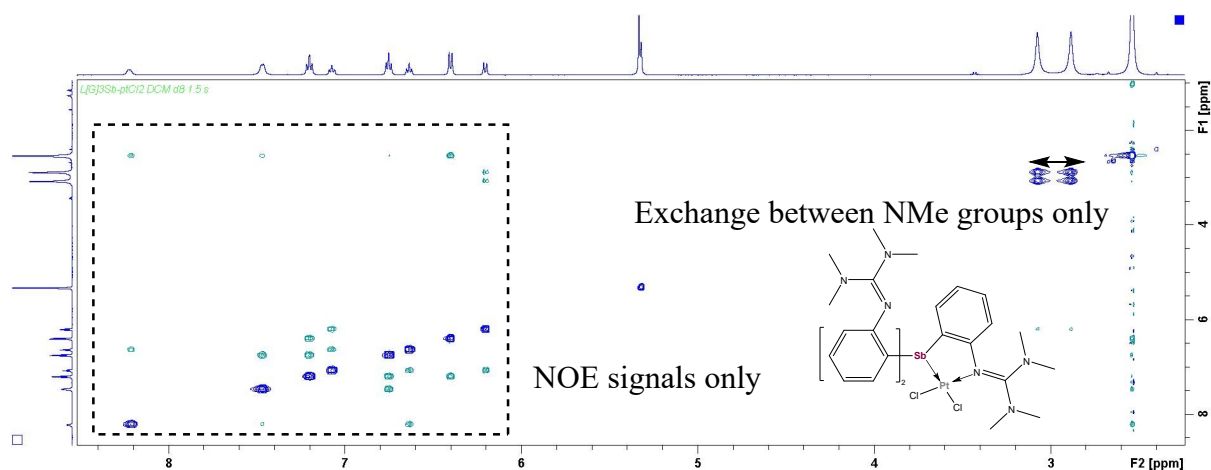

**Figure S15:**  $^1\text{H}$ - $^1\text{H}$  EXSY NMR spectrum of complex **2** in  $\text{CD}_2\text{Cl}_2$  (mixing time 1.5s, 500 MHz).

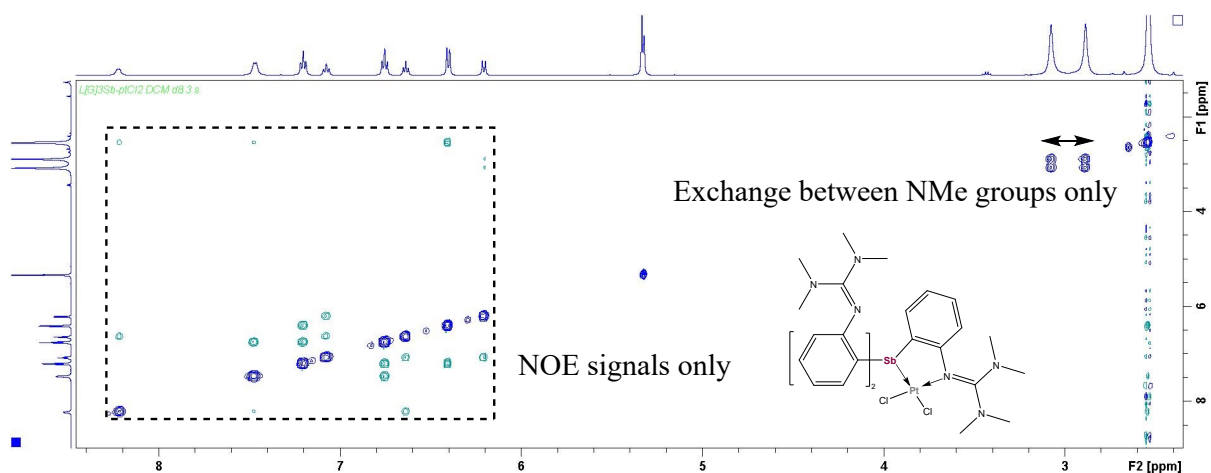

**Figure S16:**  $^1\text{H}$ - $^1\text{H}$  EXSY NMR spectrum of complex **2** in  $\text{CD}_2\text{Cl}_2$  (mixing time 3s, 500 MHz).

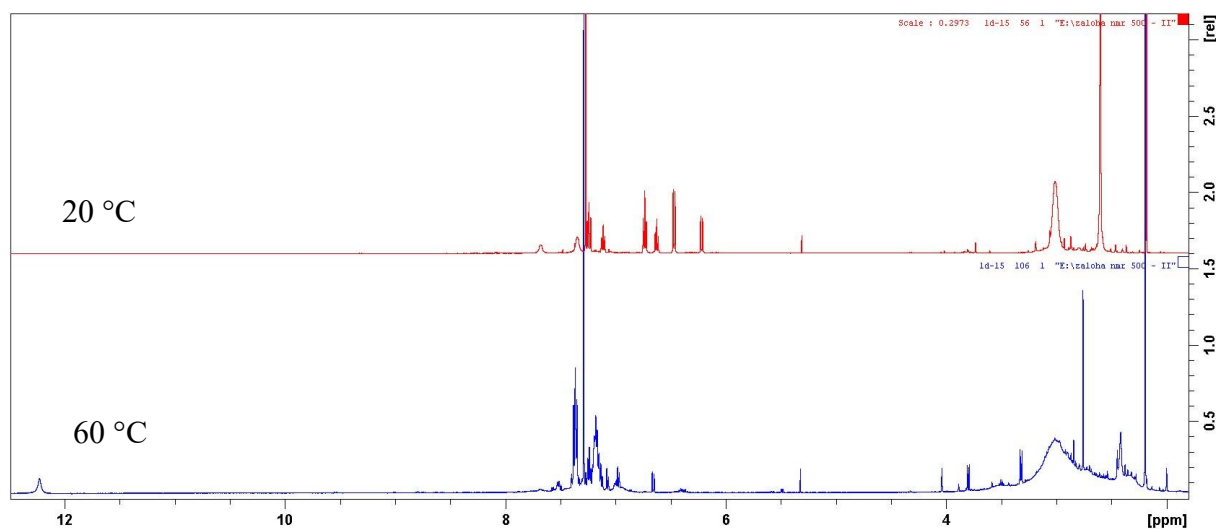

**Figure S17:**  $^1\text{H}$  NMR spectra showing decomposition (irreversible changes in spectra) of the complex **1** in  $\text{CDCl}_3$  upon heating (500 MHz).

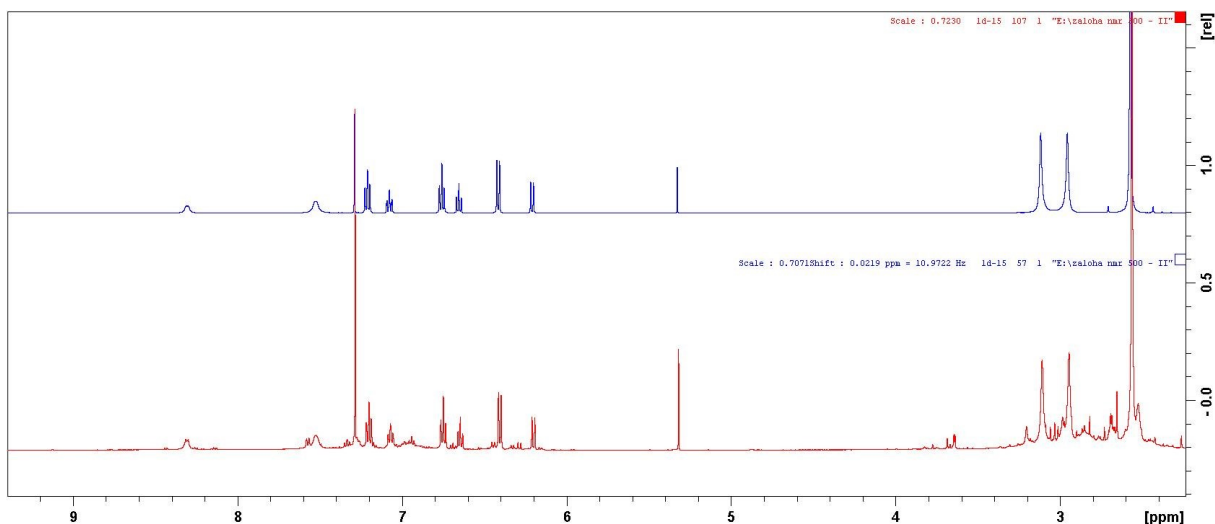

**Figure S18:**  $^1\text{H}$  NMR spectra showing decomposition (irreversible changes in spectra) of the complex **2** in  $\text{CDCl}_3$  upon heating (500 MHz).

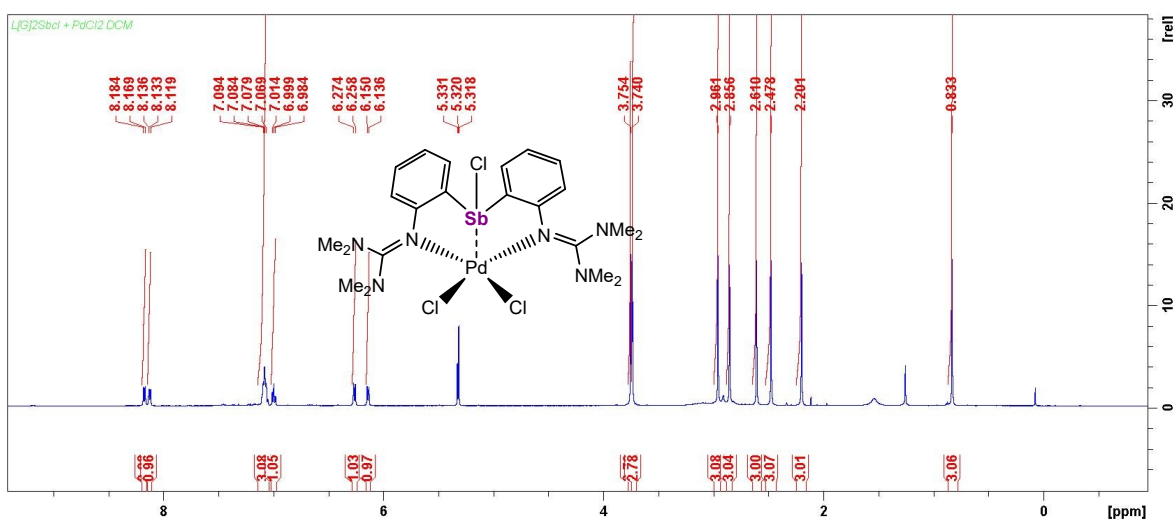

**Figure S19:**  $^1\text{H}$  NMR spectrum of complex **3** in  $\text{CD}_2\text{Cl}_2$  (500 MHz).

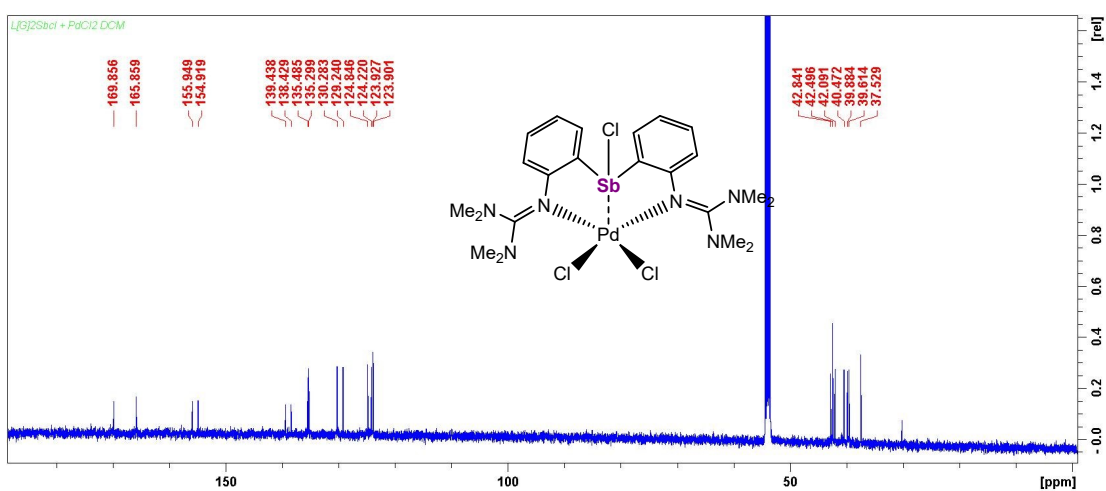

**Figure S20:**  $^{13}\text{C}\{^1\text{H}\}$  NMR spectrum of complex **3** in  $\text{CD}_2\text{Cl}_2$  (125.6 MHz).

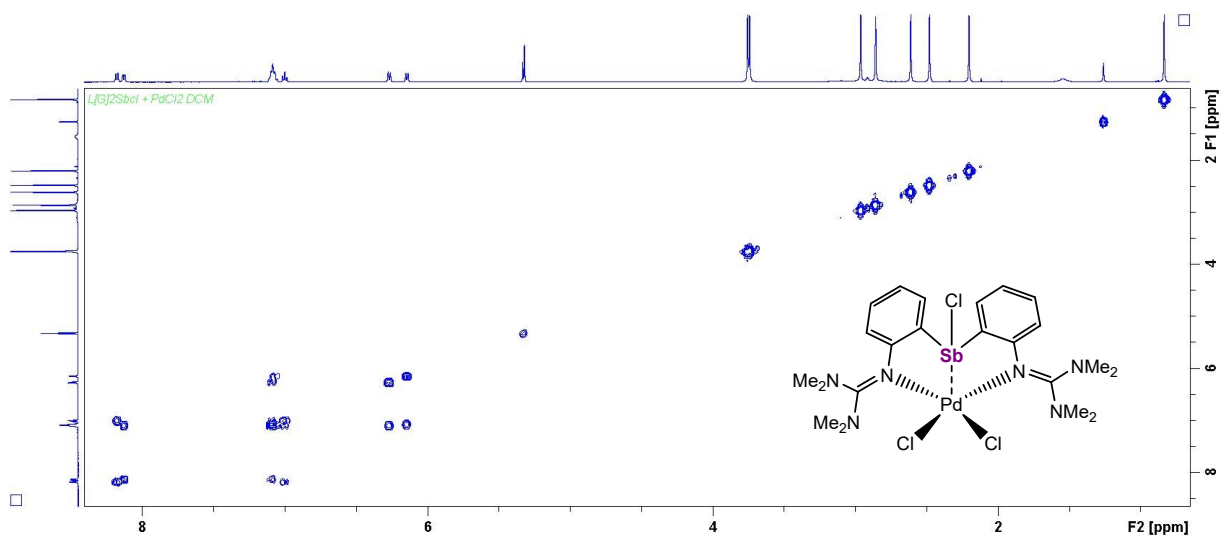

**Figure S21:**  $^1\text{H}$ - $^1\text{H}$  COSY NMR spectrum of complex **3** in  $\text{CD}_2\text{Cl}_2$  (500 MHz).

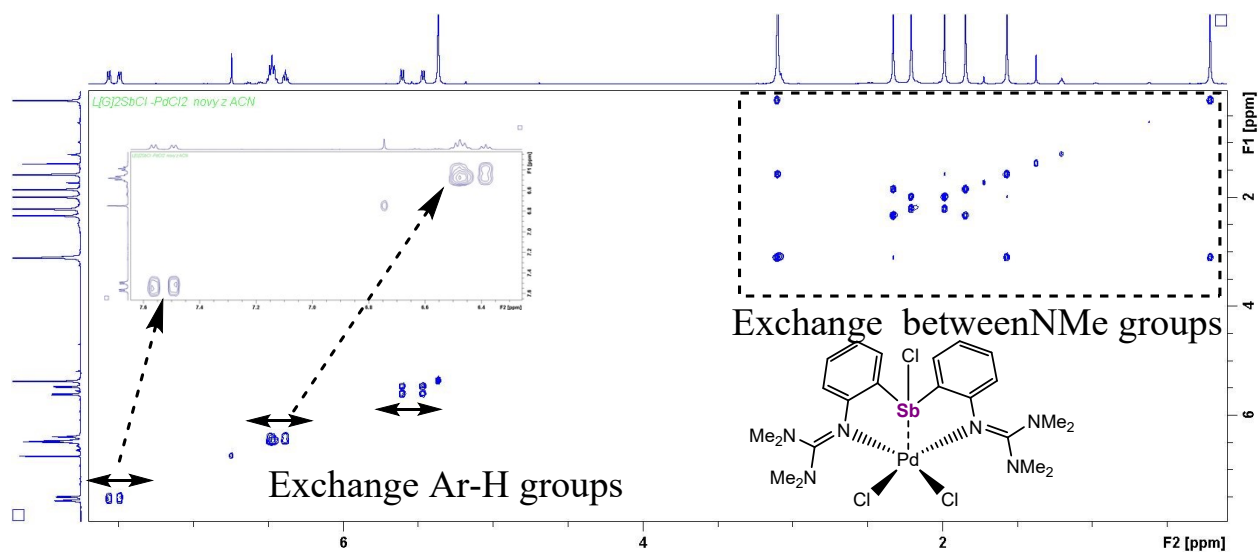

**Figure S22:**  $^1\text{H}$ - $^1\text{H}$  EXSY NMR spectrum of complex **3** in  $\text{CD}_2\text{Cl}_2$  (mixing time 0.6s, 500 MHz).

## 2) Crystallography.

Diffraction data for all compounds were collected using a Bruker Venture D8 diffractometer at 150 K with graphite-monochromated Mo-K $\alpha$  (0.7107 Å) radiation. The frames were integrated with the Bruker SAINT software package using a narrow frame algorithm. Data were corrected for absorption effects using the Multi-Scan method (SADABS). Obtained data were treated by XT-version 2014/5 and SHELXL-2017/1 software implemented in APEX3 v2016.5-0 (Bruker AXS) system.<sup>S2</sup> All non-hydrogen atoms were refined using anisotropic displacement parameters. Hydrogen atoms attached to carbon atoms were included in geometrically calculated positions using a riding model. Furthermore, disorder dichloromethane in **1** and chloroform in **2** were split to two positions by standard methods. Crystallographic data (excluding structure factors) for the structural analyses have been deposited with the Cambridge Crystallographic Data Centre, CCDC nos. 2313661 (ArSbCl<sub>2</sub>); 2313662 (Ar<sub>2</sub>SbCl); 2313664 (Ar<sub>3</sub>Sb); 2313665 (**1**); 2313666 (**2**); 2313660 (**3**); 2313659 (**4**). Copies of this information may be obtained free of charge from The Director, CCDC, 12 Union Road, Cambridge CB2 1EZ, UK (Fax: +44-1223-336033; e-mail: [deposit@ccdc.cam.ac.uk](mailto:deposit@ccdc.cam.ac.uk) or <http://www.ccdc.cam.ac.uk>).



**Table S1.** Crystal data and structure refinement of studied compounds.

|                                                                                     | <b>ArSbCl<sub>2</sub></b>                                         | <b>Ar<sub>2</sub>SbCl</b>                           | <b>Ar<sub>3</sub>Sb</b>                           |
|-------------------------------------------------------------------------------------|-------------------------------------------------------------------|-----------------------------------------------------|---------------------------------------------------|
| Formula                                                                             | C <sub>11</sub> H <sub>16</sub> Cl <sub>2</sub> N <sub>3</sub> Sb | C <sub>22</sub> H <sub>32</sub> ClN <sub>6</sub> Sb | C <sub>33</sub> H <sub>48</sub> N <sub>9</sub> Sb |
| Formula weight, g mol <sup>-1</sup>                                                 | 382.92                                                            | 537.73                                              | 692.55                                            |
| Crystal system                                                                      | Monoclinic                                                        | Monoclinic                                          | Monoclinic                                        |
| Crystal size, mm                                                                    | 0.59 × 0.24 × 0.11                                                | 0.59 × 0.45 × 0.39                                  | 0.59 × 0.54 × 0.034                               |
| Space group                                                                         | P-2 <sub>1</sub> /c                                               | P-2 <sub>1</sub> /n                                 | P-2 <sub>1</sub> /c                               |
| <i>a</i> , Å                                                                        | 8.0916(3)                                                         | 9.2439(5)                                           | 21.8886(9)                                        |
| <i>b</i> , Å                                                                        | 18.6573(8)                                                        | 28.6416(13)                                         | 14.8090(7)                                        |
| <i>c</i> , Å                                                                        | 10.0007(4)                                                        | 9.8442(5)                                           | 10.7954(5)                                        |
| $\alpha$ , °                                                                        | 90                                                                | 90                                                  | 90                                                |
| $\beta$ , °                                                                         | 105.6870(10)                                                      | 103.269(2)                                          | 90.883(2)                                         |
| $\gamma$ , °                                                                        | 90                                                                | 90                                                  | 90                                                |
| <i>V</i> , Å <sup>3</sup>                                                           | 1453.54(10)                                                       | 2536.8(2)                                           | 3498.9(3)                                         |
| <i>Z</i>                                                                            | 4                                                                 | 4                                                   | 4                                                 |
| $\rho_{\text{calcd}}$ , Mg m <sup>-3</sup>                                          | 1.750                                                             | 1.408                                               | 1.315                                             |
| $\mu$ (Mo <i>K</i> $\alpha$ ), mm <sup>-1</sup>                                     | 2.249                                                             | 1.212                                               | 0.824                                             |
| <i>F</i> (000)                                                                      | 752                                                               | 1096                                                | 1440                                              |
| $\theta$ range, deg                                                                 | 1 to 27.5                                                         | 1 to 30.0                                           | 1 to 27.5                                         |
| No. of reflns collected                                                             | 34514                                                             | 67308                                               | 69477                                             |
| No. indep. Reflns                                                                   | 3251                                                              | 8086                                                | 8063                                              |
| No. obsd reflns with ( <i>I</i> > 2 $\sigma$ ( <i>I</i> )), <i>R</i> <sub>int</sub> | 3208, 0.011                                                       | 7236, 0.023                                         | 6081, 0.040                                       |
| No. refined params                                                                  | 158                                                               | 279                                                 | 400                                               |
| Goof ( <i>F</i> <sup>2</sup> )                                                      | 1.053                                                             | 1.180                                               | 1.104                                             |
| <i>R</i> <sub>1</sub> ( <i>F</i> ) ( <i>I</i> > 2 $\sigma$ ( <i>I</i> ))            | 0.019                                                             | 0.036                                               | 0.042                                             |
| <i>wR</i> <sub>2</sub> ( <i>F</i> <sup>2</sup> ) (all data)                         | 0.046                                                             | 0.068                                               | 0.061                                             |
| Largest diff peak/hole, e Å <sup>-3</sup>                                           | 0.424 / -0.590                                                    | 0.667 / -1.546                                      | 0.496 / -1.199                                    |
| CCDC                                                                                | 2313661                                                           | 2313662                                             | 2313664                                           |

$$R_{\text{int}} = \frac{\sum |F_o^2 - F_{o,\text{mean}}^2|}{\sum F_o^2}, S = \left[ \frac{\sum (w(F_o^2 - F_c^2)^2)}{(N_{\text{diffrs}} - N_{\text{params}})} \right]^{1/2} \text{ for all data, } R(F) = \frac{\sum ||F_o| - |F_c||}{\sum |F_o|} \text{ for observed data, } wR(F^2) = \left[ \frac{\sum (w(F_o^2 - F_c^2)^2)}{(\sum w(F_o^2)^2)} \right]^{1/2} \text{ for all data.}$$

**Table S1 (continuation).** Crystal data and structure refinement of studied compounds.

|                                                                                     | 1                                                                                                          | 2                                                                                                                              |
|-------------------------------------------------------------------------------------|------------------------------------------------------------------------------------------------------------|--------------------------------------------------------------------------------------------------------------------------------|
| Formula                                                                             | C <sub>33</sub> H <sub>48</sub> Cl <sub>2</sub> N <sub>9</sub> PdSb<br>3(CH <sub>2</sub> Cl <sub>2</sub> ) | C <sub>33</sub> H <sub>48</sub> Cl <sub>2</sub> N <sub>9</sub> PtSb<br>CHCl <sub>3</sub> , 2(CH <sub>2</sub> Cl <sub>2</sub> ) |
| Formula weight, g mol <sup>-1</sup>                                                 | 1124.63                                                                                                    | 1247.76                                                                                                                        |
| Crystal system                                                                      | Monoclinic                                                                                                 | Monoclinic                                                                                                                     |
| Crystal size, mm                                                                    | 0.59 × 0.17 × 0.17                                                                                         | 0.59 × 0.59 × 0.27                                                                                                             |
| Space group                                                                         | P-2 <sub>1</sub> /n                                                                                        | P-2 <sub>1</sub> /n                                                                                                            |
| <i>a</i> , Å                                                                        | 10.7479(4)                                                                                                 | 10.7520(3)                                                                                                                     |
| <i>b</i> , Å                                                                        | 17.5505(7)                                                                                                 | 17.4818(6)                                                                                                                     |
| <i>c</i> , Å                                                                        | 25.6485(11)                                                                                                | 26.1085(10)                                                                                                                    |
| $\alpha$ , °                                                                        | 90                                                                                                         | 90                                                                                                                             |
| $\beta$ , °                                                                         | 94.068(2)                                                                                                  | 94.0400(10)                                                                                                                    |
| $\gamma$ , °                                                                        | 90                                                                                                         | 90                                                                                                                             |
| <i>V</i> , Å <sup>3</sup>                                                           | 4825.9(3)                                                                                                  | 4895.3(3)                                                                                                                      |
| <i>Z</i>                                                                            | 4                                                                                                          | 4                                                                                                                              |
| $\rho_{\text{calcd}}$ , Mg m <sup>-3</sup>                                          | 1.548                                                                                                      | 1.693                                                                                                                          |
| $\mu$ (Mo <i>K</i> $\alpha$ ), mm <sup>-1</sup>                                     | 1.411                                                                                                      | 3.934                                                                                                                          |
| <i>F</i> (000)                                                                      | 2264                                                                                                       | 2456                                                                                                                           |
| $\theta$ range, deg                                                                 | 1 to 26.5                                                                                                  | 1 to 25                                                                                                                        |
| No. of reflns collected                                                             | 110423                                                                                                     | 100748                                                                                                                         |
| No. indep. Reflns                                                                   | 9970                                                                                                       | 8597                                                                                                                           |
| No. obsd reflns with ( <i>I</i> > 2 $\sigma$ ( <i>I</i> )), <i>R</i> <sub>int</sub> | 8750, 0.017                                                                                                | 7836, 0.020                                                                                                                    |
| No. refined params                                                                  | 536                                                                                                        | 515                                                                                                                            |
| GooF ( <i>F</i> <sup>2</sup> )                                                      | 1.137                                                                                                      | 1.065                                                                                                                          |
| <i>R</i> <sub>1</sub> ( <i>F</i> ) ( <i>I</i> > 2 $\sigma$ ( <i>I</i> ))            | 0.049                                                                                                      | 0.038                                                                                                                          |
| <i>wR</i> <sub>2</sub> ( <i>F</i> <sup>2</sup> ) (all data)                         | 0.106                                                                                                      | 0.088                                                                                                                          |
| Largest diff peak/hole, e Å <sup>-3</sup>                                           | 1.641 / -1.706                                                                                             | 2.147 / -1.780                                                                                                                 |
| CCDC                                                                                | 2313665                                                                                                    | 2313666                                                                                                                        |

$$R_{\text{int}} = \frac{\sum |F_o^2 - F_{o,\text{mean}}^2|}{\sum F_o^2}, S = \left[ \frac{\sum (w(F_o^2 - F_c^2)^2)}{(N_{\text{diffrs}} - N_{\text{params}})} \right]^{1/2} \text{ for all data, } R(F) = \frac{\sum ||F_o| - |F_c||}{\sum |F_o|} \text{ for observed data, } wR(F^2) = \left[ \frac{\sum (w(F_o^2 - F_c^2)^2)}{(\sum w(F_o^2)^2)} \right]^{1/2} \text{ for all data.}$$

**Table S1 (continuation).** Crystal data and structure refinement of studied compounds.

|                                                                                     | <b>3</b>                                                            | <b>4</b>                                                            |
|-------------------------------------------------------------------------------------|---------------------------------------------------------------------|---------------------------------------------------------------------|
| Formula                                                                             | C <sub>22</sub> H <sub>32</sub> Cl <sub>3</sub> N <sub>6</sub> PdSb | C <sub>22</sub> H <sub>32</sub> Cl <sub>3</sub> N <sub>6</sub> PtSb |
| Formula weight, g mol <sup>-1</sup>                                                 | 715.03                                                              | 803.72                                                              |
| Crystal system                                                                      | Orthorhombic                                                        | Orthorhombic                                                        |
| Crystal size, mm                                                                    | 0.54 × 0.26 × 0.12                                                  | 0.13 × 0.12 × 0.04                                                  |
| Space group                                                                         | P2 <sub>1</sub> 2 <sub>1</sub> 2 <sub>1</sub>                       | P2 <sub>1</sub> 2 <sub>1</sub> 2 <sub>1</sub>                       |
| <i>a</i> , Å                                                                        | 9.5889(4)                                                           | 9.5753(3)                                                           |
| <i>b</i> , Å                                                                        | 15.5986(6)                                                          | 15.6143(5)                                                          |
| <i>c</i> , Å                                                                        | 17.8828(7)                                                          | 17.9126(5)                                                          |
| $\alpha$ , °                                                                        | 90                                                                  | 90                                                                  |
| $\beta$ , °                                                                         | 90                                                                  | 90                                                                  |
| $\gamma$ , °                                                                        | 90                                                                  | 90                                                                  |
| <i>V</i> , Å <sup>3</sup>                                                           | 2674.79(18)                                                         | 2678.14(14)                                                         |
| <i>Z</i>                                                                            | 4                                                                   | 4                                                                   |
| $\rho_{\text{calcd}}$ , Mg m <sup>-3</sup>                                          | 1.776                                                               | 1.993                                                               |
| $\mu$ (Mo <i>K</i> $\alpha$ ), mm <sup>-1</sup>                                     | 2.005                                                               | 6.549                                                               |
| <i>F</i> (000)                                                                      | 1416                                                                | 1544                                                                |
| $\theta$ range, deg                                                                 | 1 to 28.0                                                           | 1 to 26.0                                                           |
| No. of reflns collected                                                             | 25493                                                               | 23039                                                               |
| No. indep. Reflns                                                                   | 6560                                                                | 5231                                                                |
| No. obsd reflns with ( <i>I</i> > 2 $\sigma$ ( <i>I</i> )), <i>R</i> <sub>int</sub> | 6342, 0.029                                                         | 4782, 0.063                                                         |
| No. refined params                                                                  | 306                                                                 | 307                                                                 |
| Goof ( <i>F</i> <sup>2</sup> )                                                      | 1.103                                                               | 0.897                                                               |
| <i>R</i> <sub>1</sub> ( <i>F</i> ) ( <i>I</i> > 2 $\sigma$ ( <i>I</i> ))            | 0.023                                                               | 0.028                                                               |
| <i>wR</i> <sub>2</sub> ( <i>F</i> <sup>2</sup> ) (all data)                         | 0.050                                                               | 0.049                                                               |
| Largest diff peak/hole, e Å <sup>-3</sup>                                           | 0.531 / -0.804                                                      | 0.683 / -1.003                                                      |
| CCDC                                                                                | 2313660                                                             | 2313659                                                             |

$$R_{\text{int}} = \frac{\sum |F_o^2 - F_{o,\text{mean}}^2|}{\sum F_o^2}, S = \left[ \frac{\sum (w(F_o^2 - F_c^2)^2)}{(N_{\text{diffrs}} - N_{\text{params}})} \right]^{1/2} \text{ for all data, } R(F) = \frac{\sum ||F_o| - |F_c||}{\sum |F_o|} \text{ for observed data, } wR(F^2) = \left[ \frac{\sum (w(F_o^2 - F_c^2)^2)}{(\sum w(F_o^2)^2)} \right]^{1/2} \text{ for all data.}$$

#### 4) Theoretical study

The calculations were performed using the Gaussian 16 program package.<sup>S3</sup> To obtain NPA charges and Wiberg bond indices, NBO calculations were carried out using the NBO program implemented in Gaussian 16.<sup>S4</sup> The Atoms In Molecules (AIM) Analysis was performed with the MultiWFN program.<sup>S5</sup> The theoretical calculations have been carried using the  $\omega$ B97X-D range-separated functional, and to test the reliability of this method, the BP86, BP86-D3, B3LYP-D3, and M06-2X functional. The calculated results are in good agreement with the bond distances obtained from the single crystal XRD experiments. Due to the similar results, we only discuss the findings calculated with  $\omega$ B97X-D/def2-TZVP level.

We examined how strongly the formation of a given complex is preferred thermodynamically. Therefore, we optimized the geometries of artificially generated isomeric model complexes: **1\*** and **2\***, which contain the triaryl ligand with pentacoordinate Pd and Pt centers, respectively (in similar fashion as in **3** and **4**). Importantly, these isomers have significantly higher relative energies (by 8.2 and 11.0 kcal/mol) compared to the structures containing tetracoordinate metal centers. Similarly, the model complexes **3\*** and **4\***, in which the Sb center and only one imino-arm of the ligand form dative bonds with the metal centers, also lie remarkably higher in energy (12.9 and 10.3 kcal/mol, compared to **3** and **4**, respectively). These results outline that the formation of complexes having metal centers with given coordination numbers is clearly preferred due to thermodynamic reasons, and inherent stabilization effects determine the stabilities and bonding in these complexes.

**Table S2.** Properties of the bonds in the complexes calculated distances (d, Å), Wiberg bond indices (WBIs), Electron Density at the Bond Critical Point ( $\rho$ , e/Bohr<sup>3</sup>) at  $\omega$ B97X-D/def2-TZVP level.

|           | M-Sb  |       |        | M-Cl  |       |        | M-Cl  |       |        | M-N   |       |        |
|-----------|-------|-------|--------|-------|-------|--------|-------|-------|--------|-------|-------|--------|
|           | d     | WBI   | $\rho$ |
| <b>1</b>  | 2.480 | 0.541 | 0.087  | 2.387 | 0.302 | 0.032  | 2.297 | 0.466 | 0.089  | 2.131 | 0.270 | 0.086  |
| <b>2</b>  | 2.482 | 0.610 | 0.099  | 2.305 | 0.523 | 0.101  | 2.389 | 0.341 | 0.084  | 2.115 | 0.328 | 0.102  |
| <b>3</b>  | 2.997 | 0.106 | 0.029  | 2.288 | 0.515 | 0.092  | 2.307 | 0.482 | 0.088  | 2.084 | 0.309 | 0.092  |
| <b>4</b>  | 2.946 | 0.182 | 0.037  | 2.301 | 0.543 | 0.099  | 2.316 | 0.516 | 0.103  | 2.076 | 0.360 | 0.113  |
| <b>1*</b> | 2.485 | 0.496 | 0.083  | 2.352 | 0.350 | 0.079  | 2.283 | 0.498 | 0.092  | 2.138 | 0.271 | 0.084  |
| <b>2*</b> | 2.480 | 0.588 | 0.096  | 2.360 | 0.384 | 0.090  | 2.296 | 0.544 | 0.104  | 2.122 | 0.326 | 0.101  |
| <b>3*</b> | 3.175 | 0.049 | 0.021  | 2.294 | 0.510 | 0.090  | 2.315 | 0.474 | 0.085  | 2.091 | 0.303 | 0.095  |
| <b>4*</b> | 3.184 | 0.073 | 0.024  | 2.308 | 0.536 | 0.101  | 2.321 | 0.511 | 0.098  | 2.086 | 0.339 | 0.109  |

**Table S3.** Properties of the bonds in the complexes calculated distances (d, Å), Wiberg bond indices (WBIs), Electron Density at the Bond Critical Point ( $\rho$ , e/Bohr<sup>3</sup>) at  $\omega$ B97X-D/def2-TZVP level.

|           | M-N   |       |        | Cl-Sb |       |        |
|-----------|-------|-------|--------|-------|-------|--------|
|           | d     | WBI   | $\rho$ | d     | WBI   | $\rho$ |
| <b>3</b>  | 2.099 | 0.290 | 0.097  | 2.423 | 0.678 | 0.078  |
| <b>4</b>  | 2.088 | 0.341 | 0.109  | 2.455 | 0.628 | 0.073  |
| <b>1*</b> | 2.104 | 0.283 | 0.090  | -     | -     | -      |
| <b>2*</b> | 2.077 | 0.355 | 0.112  | -     | -     | -      |
| <b>3*</b> | -     | -     | -      | 2.331 | 0.769 | 0.094  |
| <b>4*</b> | -     | -     | -      | 2.335 | 0.759 | 0.093  |

**Table S4.** The experimental and calculated bond lengths (Å) in complex 1

| Complex 1     |                    |                 |        |           |       |          |
|---------------|--------------------|-----------------|--------|-----------|-------|----------|
| Bond          | Experimental (XRD) | $\omega$ B97X-D | M06-2X | B3LYP-GD3 | BP86  | BP86-GD3 |
| <b>Sb-Pd</b>  | 2.457              | 2.480           | 2.468  | 2.492     | 2.51  | 2.476    |
| <b>N-Pd</b>   | 2.082              | 2.131           | 2.168  | 2.162     | 2.13  | 2.134    |
| <b>Cl-Pd</b>  | 2.299              | 2.297           | 2.332  | 2.32      | 2.31  | 2.315    |
| <b>Cl'-Pd</b> | 2.400              | 2.387           | 2.438  | 2.409     | 2.385 | 2.394    |

**Table S5.** The experimental and calculated bond lengths (Å) in complex 2

| Complex 2     |                    |                 |        |           |       |          |
|---------------|--------------------|-----------------|--------|-----------|-------|----------|
| Bond          | Experimental (XRD) | $\omega$ B97X-D | M06-2X | B3LYP-GD3 | BP86  | BP86-GD3 |
| <b>Sb-Pt</b>  | 2.466              | 2.482           | 2.448  | 2.491     | 2.510 | 2.480    |
| <b>N-Pt</b>   | 2.072              | 2.115           | 2.121  | 2.128     | 2.114 | 2.111    |
| <b>Cl-Pt</b>  | 2.302              | 2.305           | 2.316  | 2.327     | 2.318 | 2.319    |
| <b>Cl'-Pt</b> | 2.386              | 2.389           | 2.436  | 2.411     | 2.390 | 2.401    |

**Table S6.** The experimental and calculated bond lengths (Å) in complex 3

| Complex 3     |                    |                 |        |           |       |          |
|---------------|--------------------|-----------------|--------|-----------|-------|----------|
| Bond          | Experimental (XRD) | $\omega$ B97X-D | M06-2X | B3LYP-GD3 | BP86  | BP86-GD3 |
| <b>Sb-Cl</b>  | 2.461              | 2.423           | 2.415  | 2.466     | 2.495 | 2.489    |
| <b>Sb-Pd</b>  | 2.883              | 2.997           | 3.066  | 2.936     | 2.872 | 2.866    |
| <b>N-Pd</b>   | 2.055              | 2.084           | 2.109  | 2.1       | 2.105 | 2.082    |
| <b>N'-Pd</b>  | 2.06               | 2.099           | 2.134  | 2.113     | 2.115 | 2.089    |
| <b>Cl-Pd</b>  | 2.314              | 2.288           | 2.336  | 2.328     | 2.323 | 2.325    |
| <b>Cl'-Pd</b> | 2.3                | 2.307           | 2.307  | 2.309     | 2.308 | 2.305    |

**Table S7.** The experimental and calculated bond lengths (Å) in complex **4**

| <b>Complex 4</b> |                           |                |               |                  |             |                 |
|------------------|---------------------------|----------------|---------------|------------------|-------------|-----------------|
| <b>Bond</b>      | <b>Experimental (XRD)</b> | <b>ωB97X-D</b> | <b>M06-2X</b> | <b>B3LYP-GD3</b> | <b>BP86</b> | <b>BP86-GD3</b> |
| <b>Sb-Cl</b>     | 2.515                     | 2.455          | 2.458         | 2.499            | 2.522       | 2.516           |
| <b>Sb-Pt</b>     | 2.816                     | 2.946          | 2.931         | 2.902            | 2.86        | 2.857           |
| <b>N-Pt</b>      | 2.049                     | 2.088          | 2.093         | 2.092            | 2.093       | 2.077           |
| <b>N'-Pt</b>     | 2.049                     | 2.076          | 2.076         | 2.103            | 2.102       | 2.083           |
| <b>Cl-Pt</b>     | 2.309                     | 2.301          | 2.327         | 2.321            | 2.319       | 2.317           |
| <b>Cl'-Pt</b>    | 2.318                     | 2.316          | 2.304         | 2.336            | 2.33        | 2.331           |

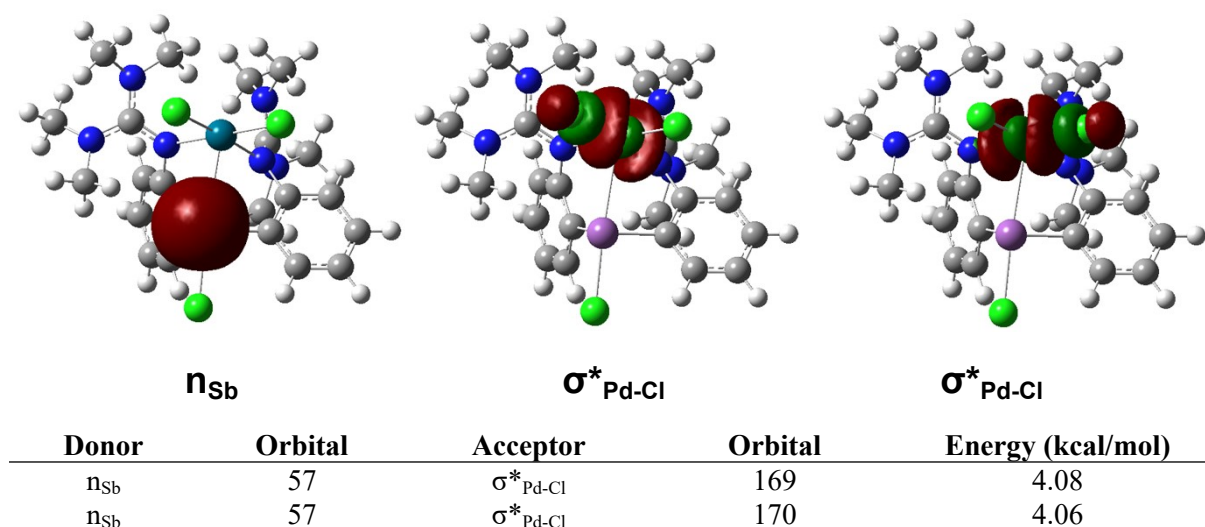

**Figure S23.** NBOs involved in  $n_{\text{Sb}} \rightarrow \sigma^*_{\text{Pd-Cl}}$  second order interactions in complex **3**.

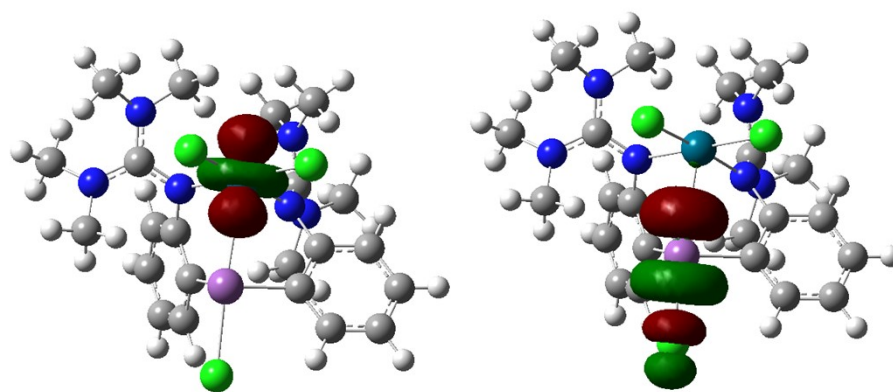

**$n_{Pd}$**

**$\sigma^*_{Sb-Cl}$**

| Donor    | Orbital | Acceptor           | Orbital | Energy (kcal/mol) |
|----------|---------|--------------------|---------|-------------------|
| $n_{Pd}$ | 65      | $\sigma^*_{Sb-Cl}$ | 165     | 10.55             |

**Figure S24.** NBOs involved in  $n_{Pd} \rightarrow \sigma^*_{Sb-Cl}$  second order interactions in complex 3.

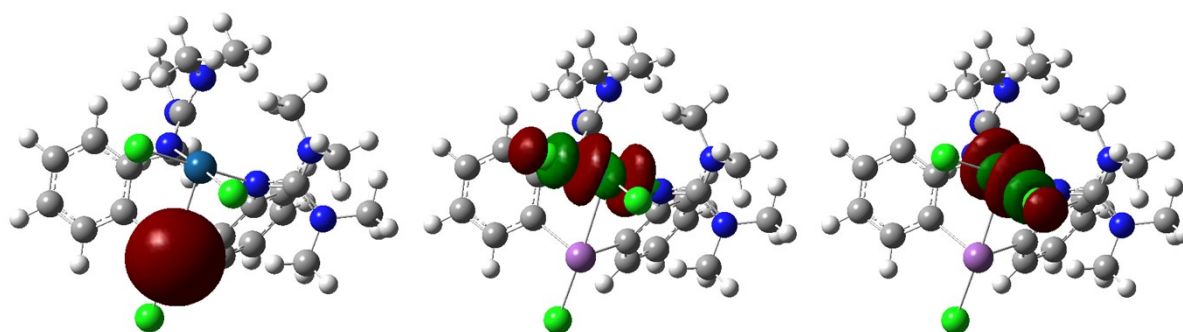

**$n_{Sb}$**

**$\sigma^*_{Pt-Cl}$**

**$\sigma^*_{Pt-Cl}$**

| Donor    | Orbital | Acceptor           | Orbital | Energy (kcal/mol) |
|----------|---------|--------------------|---------|-------------------|
| $n_{Sb}$ | 57      | $\sigma^*_{Pt-Cl}$ | 169     | 3.80              |
| $n_{Sb}$ | 57      | $\sigma^*_{Pt-Cl}$ | 170     | 3.72              |

**Figure S25.** NBOs involved in  $n_{Sb} \rightarrow \sigma^*_{Pt-Cl}$  second order interactions in complex 4.

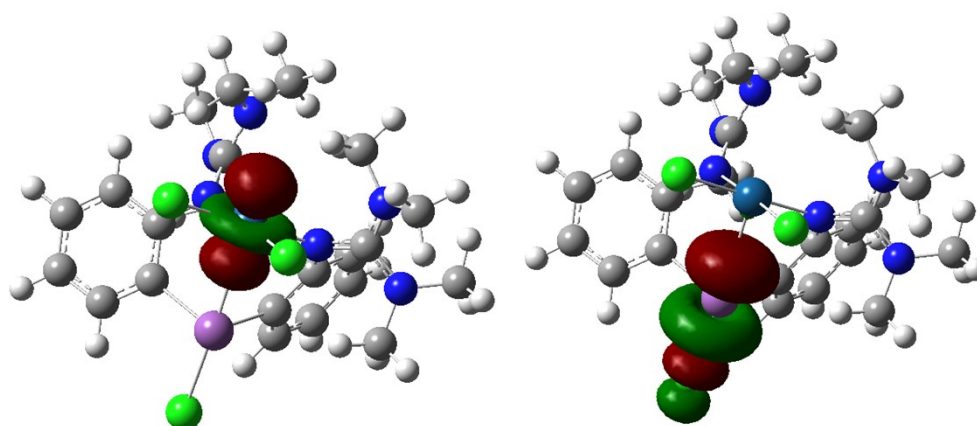

|                 |                | <b>n<sub>Pt</sub></b> |                |                          |
|-----------------|----------------|-----------------------|----------------|--------------------------|
| <b>Donor</b>    | <b>Orbital</b> | <b>Acceptor</b>       | <b>Orbital</b> | <b>Energy (kcal/mol)</b> |
| n <sub>Pt</sub> | 65             | σ* <sub>Sb-Cl</sub>   | 165            | 25.65                    |

**Figure S26.** NBOs involved in n<sub>Pt</sub>→σ\*<sub>Sb-Cl</sub> second order interactions in complex **4**.

**Table S8.** Donor-acceptor interactions in complex **3** and their deletion energies at level ωB97X-D/def2-TZVP.

| <b>Interaction</b>                   | <b>E<sub>del</sub> (kcal/mol)</b> |
|--------------------------------------|-----------------------------------|
| n <sub>Sb</sub> →σ* <sub>Pd-Cl</sub> | 5.30                              |
| n <sub>Pd</sub> →σ* <sub>Sb-Cl</sub> | 7.87                              |

**Table S9.** Donor-acceptor interactions in complex **4** and their deletion energies at level ωB97X-D/def2-TZVP.

| <b>Interaction</b>                   | <b>E<sub>del</sub> (kcal/mol)</b> |
|--------------------------------------|-----------------------------------|
| n <sub>Sb</sub> →σ* <sub>Pt-Cl</sub> | 4.94                              |
| n <sub>Pt</sub> →σ* <sub>Sb-Cl</sub> | 17.90                             |

**Geometries:**



**1**

E = -3068.0568278

C 0.835302 -1.268765 2.344886

C 0.961475 -0.264189 1.401797

C 1.546060 0.964543 1.723344

C 2.043787 1.145909 3.017299

C 1.922216 0.134954 3.956747

C 1.314351 -1.071657 3.632965

Sb 0.160142 -0.329587 -0.547847

C 1.683862 -0.282572 -1.995002

C 2.834131 -1.045006 -1.764544

C 3.845238 -1.022849 -2.728325

C 3.714201 -0.242890 -3.864503

C 2.578438 0.527719 -4.070700

C 1.559478 0.505478 -3.129785

N 2.872557 -1.844237 -0.630043

C 3.873812 -1.891564 0.180781

N 4.880444 -0.961596 0.289251

C 4.677935 0.434721 -0.014571

N 1.674424 1.876550 0.690689

C 1.383323 3.136802 0.794347

N 0.540980 3.670829 1.735156

C -0.600268 2.936575 2.226785

Pd -2.015025 0.845677 -0.736369

Cl -4.218227 1.741242 -0.936437

C -0.727395 -2.248100 -0.557805

C -2.074178 -2.235353 -0.157380

C -2.675812 -3.476948 0.101615

C -1.993785 -4.660234 -0.123748

C -0.689582 -4.658459 -0.591088  
C -0.057294 -3.439896 -0.783044  
N -2.705387 -1.002677 0.068904  
C -3.982362 -0.965387 0.483169  
N -4.961650 -1.591189 -0.195867  
C -6.131643 -2.166825 0.430029  
Cl -1.046997 2.709675 -1.666989  
C -4.815138 -1.851727 -1.614257  
C 6.250458 -1.346044 0.535356  
N -4.287211 -0.293106 1.601618  
C -5.546059 0.413925 1.772285  
C -3.228514 0.151732 2.487758  
C 0.764560 4.964455 2.333461  
N 3.964769 -2.949857 1.051472  
C 4.330075 -2.734614 2.438885  
C 3.114510 -4.096532 0.827118  
N 1.934059 4.011044 -0.092805  
C 1.156553 5.104329 -0.651188  
C 3.000455 3.531409 -0.946523  
H -3.683771 -3.527370 0.488555  
H -2.497637 -5.598938 0.073827  
H -0.166425 -5.587294 -0.777412  
H 0.981571 -3.401754 -1.085264  
H -2.378346 -0.521959 2.437205  
H -3.617434 0.176380 3.506765  
H -2.898901 1.155872 2.206053  
H -6.118822 0.003750 2.607996  
H -6.125331 0.375174 0.856510  
H -5.326028 1.464685 1.962729

H -4.092891 -1.159693 -2.038097  
H -5.779125 -1.683000 -2.095691  
H -4.493354 -2.881114 -1.799450  
H -6.225632 -3.207182 0.105476  
H -7.046377 -1.637904 0.151444  
H -6.028125 -2.153729 1.512081  
H 4.731961 -1.626519 -2.575406  
H 4.508866 -0.239726 -4.601004  
H 3.081995 -4.334139 -0.233476  
H 2.088019 -3.921220 1.167971  
H 3.527463 -4.947690 1.371623  
H 0.672959 1.114055 -3.268651  
H 2.481769 1.136000 -4.960401  
H 5.136799 -3.407330 2.743615  
H 3.464492 -2.910077 3.084233  
H 4.647337 -1.706885 2.592606  
H 6.333208 -2.427795 0.602706  
H 6.634329 -0.906781 1.462718  
H 6.884575 -0.999911 -0.288381  
H 5.150200 1.036124 0.768772  
H 3.620316 0.682719 -0.029489  
H 5.114783 0.714515 -0.979735  
H 2.521202 2.083327 3.276680  
H 2.307732 0.290755 4.957350  
H 1.220846 -1.853348 4.376208  
H 0.365236 -2.208297 2.073867  
H 3.730987 2.981715 -0.358585  
H 3.489788 4.393132 -1.402165  
H 2.623358 2.872054 -1.735176

H 1.658626 6.063346 -0.494445  
H 0.166069 5.131965 -0.208245  
H 1.020584 4.943429 -1.722669  
H 0.792555 4.863226 3.423787  
H -0.028053 5.676631 2.080038  
H 1.716713 5.371416 2.001541  
H -0.826867 2.113297 1.553837  
H -1.470232 3.598555 2.237210  
H -0.438294 2.541777 3.236173

## 2

E = -3059.5350542  
C 1.502074 0.470991 -3.105686  
C 1.733449 -0.306694 -1.980548  
C 2.925144 -1.022566 -1.828005  
C 3.866396 -0.966879 -2.858619  
C 3.628387 -0.197696 -3.984966  
C 2.452749 0.528498 -4.114173  
Sb 0.303981 -0.393671 -0.443418  
C 1.225184 -0.295505 1.450525  
C 1.756691 0.964533 1.739106  
C 2.333035 1.172357 2.995992  
C 2.338832 0.153301 3.934423  
C 1.782599 -1.086583 3.645526  
C 1.226658 -1.308487 2.392844  
N 1.757051 1.885164 0.705794  
C 1.412255 3.128122 0.848874  
N 0.613270 3.606780 1.856288  
C -0.453096 2.809222 2.414216

N 3.078254 -1.811711 -0.694820  
C 4.130544 -1.789697 0.049382  
N 4.344244 -2.831158 0.919093  
C 4.798634 -2.582612 2.273908  
Pt -1.906626 0.721278 -0.616789  
Cl -1.087871 2.671365 -1.532772  
Cl -4.140764 1.538474 -0.839109  
N -2.576109 -1.134447 0.146820  
C -3.861052 -1.149938 0.552512  
N -4.802048 -1.808300 -0.144878  
C -4.612453 -2.073610 -1.557994  
C -0.534314 -2.332486 -0.396198  
C -1.890217 -2.349090 -0.026355  
C -2.460639 -3.600055 0.258055  
C -1.739333 -4.768813 0.088545  
C -0.424392 -4.742525 -0.347041  
C 0.174474 -3.511962 -0.564920  
C -5.963101 -2.426299 0.457628  
C 0.841712 4.885129 2.484286  
N -4.203026 -0.503171 1.673826  
C -3.173508 -0.046312 2.589041  
C -5.486197 0.160058 1.835956  
C 3.555585 -4.031195 0.761815  
N 1.853388 4.038936 -0.060856  
C 1.002773 5.124419 -0.517162  
C 2.857819 3.615904 -1.013957  
N 5.083502 -0.798765 0.086207  
C 4.777080 0.580572 -0.209070  
C 6.488464 -1.099190 0.230851

H -3.475328 -3.670867 0.623521  
H -2.220367 -5.715077 0.305876  
H 0.130591 -5.660494 -0.490228  
H 1.217359 -3.450231 -0.850009  
H -6.056020 -0.277251 2.659671  
H -6.052867 0.111668 0.912676  
H -5.302132 1.215048 2.041073  
H -2.304750 -0.695778 2.538968  
H -3.582262 -0.057568 3.600473  
H -2.865395 0.971506 2.334588  
H -6.014763 -3.467349 0.126683  
H -6.889732 -1.927384 0.164148  
H -5.879383 -2.414671 1.541390  
H -3.899877 -1.364580 -1.969682  
H -5.569239 -1.939442 -2.063853  
H -4.254737 -3.094191 -1.724242  
H 2.771137 2.135914 3.227725  
H 2.784219 0.328950 4.906504  
H 1.788317 -1.874478 4.388137  
H 0.795577 -2.273733 2.149335  
H 3.651037 3.073588 -0.506005  
H 3.280970 4.503784 -1.485311  
H 2.432029 2.965448 -1.784914  
H 1.484378 6.093881 -0.359549  
H 0.048000 5.101415 -0.001457  
H 0.793423 4.999070 -1.581242  
H 0.966058 4.746886 3.564045  
H 0.006182 5.575376 2.325550  
H 1.747424 5.340334 2.090524

H -0.712819 2.005359 1.728631  
H -1.339305 3.439052 2.529438  
H -0.189842 2.382714 3.388796  
H 4.784146 -1.535309 -2.765205  
H 4.370283 -0.167635 -4.774059  
H 2.272361 1.129043 -4.996081  
H 0.584790 1.044005 -3.185229  
H 3.452158 -4.272906 -0.293314  
H 2.551469 -3.922000 1.187180  
H 4.065408 -4.852576 1.268883  
H 5.671234 -3.195743 2.517087  
H 3.999375 -2.814115 2.983716  
H 5.054053 -1.534308 2.401788  
H 6.913208 -0.629212 1.124740  
H 7.038093 -0.724343 -0.639790  
H 6.640577 -2.173454 0.297462  
H 5.269834 1.215595 0.534038  
H 3.708835 0.767225 -0.146147  
H 5.123788 0.876306 -1.205557

### 3

E = -2935.2340967  
C -0.172079 -1.613763 1.254912  
C -0.752349 -2.229251 2.359062  
C -0.271821 -2.020145 3.642748  
C 0.799570 -1.163044 3.837522  
C 1.389437 -0.544151 2.750012  
C 0.932620 -0.781972 1.452159  
N 1.608634 -0.145128 0.380095

C 2.923586 -0.313813 0.330597  
N 3.752128 0.664831 -0.082394  
C 4.941934 0.375731 -0.861921  
Sb -0.968206 -1.902266 -0.748152  
C -2.563662 -0.472284 -0.470734  
C -2.295730 0.873249 -0.209329  
C -3.343445 1.793487 -0.216342  
C -4.648337 1.385240 -0.417453  
C -4.924209 0.046434 -0.638536  
C -3.881129 -0.864838 -0.679292  
N -0.975551 1.347466 0.016199  
C -0.797501 2.258709 0.949372  
N -1.494130 2.268826 2.118667  
C -2.048786 3.499487 2.644024  
Pd 0.532443 0.645017 -1.239492  
Cl -0.628191 1.509602 -3.011701  
Cl -2.321717 -3.811292 -0.118724  
Cl 2.110384 -0.253939 -2.662073  
C -2.050958 1.064412 2.696031  
C 3.311227 2.036031 -0.152661  
N 0.124805 3.243775 0.791867  
C 0.822318 3.829463 1.914089  
C 0.309926 3.909113 -0.485138  
N 3.508834 -1.479520 0.710117  
C 2.850366 -2.752209 0.504688  
C 4.728768 -1.516633 1.484227  
H -3.122569 2.846257 -0.087232  
H -5.445251 2.118301 -0.423196  
H -5.940745 -0.285972 -0.804430



H -4.102162 -1.907179 -0.872599  
H 1.344550 3.835214 -0.823528  
H 0.058761 4.969411 -0.376792  
H -0.325744 3.459568 -1.244038  
H 1.871789 3.971816 1.646816  
H 0.767805 3.166312 2.774597  
H 0.418052 4.808211 2.193535  
H 4.138146 2.690819 0.132772  
H 2.476494 2.180726 0.525980  
H 2.992517 2.287193 -1.168703  
H 4.852928 0.867267 -1.832281  
H 5.023161 -0.691794 -1.039602  
H 5.840931 0.734069 -0.353240  
H 5.535929 -2.021229 0.945379  
H 4.545928 -2.057235 2.418022  
H 5.049204 -0.506499 1.727347  
H 3.605481 -3.486721 0.218409  
H 2.138677 -2.664547 -0.312919  
H 2.335610 -3.104555 1.403324  
H -1.600231 -2.886817 2.212590  
H -0.741202 -2.513569 4.484123  
H 1.174697 -0.970690 4.835171  
H 2.222121 0.134983 2.895293  
H -1.504509 0.196854 2.346091  
H -3.107676 0.943460 2.438737  
H -1.951395 1.123389 3.781680  
H -1.686850 3.704023 3.655293  
H -3.139172 3.412494 2.676873  
H -1.798759 4.339613 2.001277

4

E = -2926.715284

C 0.887997 -2.401835 2.310812

C 0.273743 -1.736229 1.255194

C -0.840952 -0.941431 1.526531

C -1.278715 -0.787267 2.842398

C -0.654204 -1.455238 3.880401

C 0.430090 -2.276032 3.613729

Sb 1.034372 -1.878729 -0.781805

C 2.610685 -0.439786 -0.435261

C 2.319207 0.883364 -0.101279

C 3.344733 1.826460 -0.065581

C 4.656741 1.457273 -0.295318

C 4.958570 0.137750 -0.586813

C 3.934776 -0.792724 -0.669133

N 0.987123 1.317773 0.158620

C 0.806464 2.188901 1.133743

N -0.120056 3.174541 1.027974

C -0.334775 3.884609 -0.220077

N -1.550189 -0.254915 0.503776

C -2.866893 -0.438755 0.476346

N -3.419223 -1.634512 0.798982

C -2.743122 -2.879529 0.499133

Pt -0.513244 0.609365 -1.089298

Cl -2.123607 -0.248008 -2.515742

Cl 0.594408 1.583108 -2.855942

Cl 2.470825 -3.797090 -0.251363

C -0.813967 3.703146 2.180407

C -4.621807 -1.742576 1.593423  
N 1.514577 2.147996 2.293525  
C 2.066568 3.355559 2.872607  
C 2.085467 0.920554 2.806011  
N -3.721322 0.548158 0.144191  
C -4.918155 0.284767 -0.633112  
C -3.319144 1.932721 0.172996  
H 3.102627 2.866309 0.118531  
H 5.437872 2.206632 -0.268292  
H 5.980807 -0.163719 -0.775420  
H 4.174349 -1.819488 -0.915786  
H 1.995748 0.925427 3.893935  
H 3.140321 0.821486 2.532738  
H 1.542792 0.067339 2.417420  
H 1.805834 4.223694 2.272834  
H 3.157580 3.273318 2.891634  
H 1.712328 3.508769 3.895457  
H -1.865233 3.853518 1.925525  
H -0.411971 4.669014 2.503799  
H -0.751859 3.000278 3.008297  
H 0.320282 3.497947 -0.996487  
H -0.129095 4.948309 -0.063474  
H -1.364692 3.779535 -0.564361  
H -2.120792 -0.134110 3.042492  
H -1.011313 -1.328424 4.894958  
H 0.927388 -2.806531 4.415650  
H 1.744612 -3.032529 2.108510  
H -3.042377 2.275693 -0.827911  
H -2.465312 2.046369 0.833206

H -4.152953 2.537372 0.538324  
H -5.815600 0.589600 -0.088272  
H -4.979678 -0.770500 -0.878955  
H -4.855742 0.840209 -1.570675  
H -5.430482 -2.228330 1.040040  
H -4.954818 -0.755558 1.904925  
H -4.409187 -2.336351 2.487593  
H -3.491907 -3.608700 0.184486  
H -2.201355 -3.275912 1.362558  
H -2.051952 -2.727654 -0.326593

**3\***

E = -2935.2166103  
C 1.727591 3.423261 -0.940554  
C 1.504560 2.083122 -0.669105  
C 2.515031 1.266704 -0.135887  
C 3.733513 1.886380 0.181145  
C 3.944661 3.225795 -0.097364  
C 2.957217 4.005231 -0.678202  
Sb -0.375493 1.117579 -0.719353  
Pd 0.589758 -1.172505 -0.689560  
Cl -1.236413 -2.172327 -1.627453  
N 2.219146 -0.076009 0.156195  
C 3.143187 -0.858563 0.740874  
N 2.840772 -1.474234 1.891958  
C 1.657572 -1.079046 2.633129  
C -1.277614 1.915253 0.995411  
C -0.735570 2.782424 1.926426  
C -1.458537 3.075734 3.074793

C -2.704998 2.489698 3.264475  
C -3.244007 1.613978 2.335611  
C -2.524818 1.307610 1.176741  
N -2.938908 0.525020 0.118828  
C -3.646195 -0.564559 0.240146  
N -4.412736 -0.960442 -0.801603  
C -4.586758 -0.053984 -1.919548  
N -3.646398 -1.358393 1.355864  
C -4.834491 -2.012351 1.849933  
C -2.454160 -1.513547 2.156054  
Cl 1.779549 -3.201393 -0.644657  
N 4.361705 -1.030710 0.199573  
C 4.561728 -0.852145 -1.225599  
C 5.560603 -1.263435 0.976218  
C 3.350455 -2.791856 2.236212  
C -4.593412 -2.364013 -1.126423  
H 4.525950 1.328637 0.659314  
H 4.903534 3.664857 0.150393  
H 3.134230 5.048775 -0.901307  
H 0.925411 4.020929 -1.358856  
H 1.451057 -0.022959 2.487420  
H 1.833305 -1.272868 3.691966  
H 0.790050 -1.658634 2.302758  
H 3.958534 -2.754982 3.143402  
H 3.922960 -3.201403 1.411559  
H 2.501320 -3.457144 2.395351  
H 3.613408 -0.963361 -1.743277  
H 5.241710 -1.628838 -1.577225  
H 4.989829 0.129951 -1.447246

H 6.321392 -0.540766 0.668390  
H 5.960177 -2.268015 0.818796  
H 5.360154 -1.120753 2.034987  
H -4.221527 1.176602 2.497065  
H -3.273770 2.726953 4.155650  
H -1.059767 3.760541 3.811491  
H 0.238560 3.228055 1.758156  
H -4.662712 0.969346 -1.563342  
H -5.500423 -0.327783 -2.449267  
H -3.737253 -0.117869 -2.606248  
H -5.649973 -2.644513 -1.098129  
H -4.029304 -2.988635 -0.440682  
H -4.203166 -2.550368 -2.128540  
H -5.005230 -1.721055 2.891864  
H -4.749299 -3.103263 1.812122  
H -5.699509 -1.710177 1.264381  
H -1.583676 -1.206991 1.579834  
H -2.331735 -2.570564 2.405066  
H -2.495342 -0.931413 3.083209  
Cl -1.365843 2.193700 -2.534646

**4\***

E = -2926.6946841  
C 1.526396 3.535430 -0.944901  
C 1.370184 2.190663 -0.645048  
C 2.429444 1.436204 -0.115003  
C 3.623090 2.121336 0.165259  
C 3.764717 3.462502 -0.142149  
C 2.728920 4.182595 -0.716805

Sb -0.460758 1.142427 -0.695089  
Pt 0.590849 -1.090809 -0.457446  
N 2.226320 0.084485 0.210415  
C 3.239475 -0.610028 0.772779  
N 3.073102 -1.142512 1.988331  
C 3.685232 -2.398893 2.389220  
C -1.530404 2.071022 0.846425  
C -2.759616 1.422245 1.005118  
C -3.579786 1.818019 2.066096  
C -3.155438 2.819842 2.923810  
C -1.925516 3.446681 2.758539  
C -1.102442 3.064574 1.708033  
N -3.057576 0.507019 0.018090  
C -3.732601 -0.591798 0.216296  
N -4.414798 -1.130684 -0.820249  
C -4.540671 -0.361666 -2.042677  
N -3.778241 -1.257458 1.411531  
C -4.974753 -1.896102 1.904776  
C -2.637578 -1.268945 2.298328  
Cl -1.187784 -2.307965 -1.248588  
Cl 1.848395 -3.077380 -0.257637  
N 4.409621 -0.758378 0.132836  
C 5.685520 -0.876684 0.806715  
C 4.474046 -0.628549 -1.311072  
C 1.941380 -0.740250 2.804497  
C -4.533739 -2.567037 -0.993260  
H 4.451416 1.612006 0.637365  
H 4.705643 3.951738 0.079031  
H 2.850173 5.229048 -0.962281

H 0.689915 4.084832 -1.362665  
H 4.368872 -2.255263 3.229299  
H 4.204292 -2.849822 1.550699  
H 2.891235 -3.086796 2.681109  
H 1.670025 0.289742 2.593921  
H 2.224425 -0.835408 3.853401  
H 1.078658 -1.381315 2.602175  
H 6.371782 -0.139473 0.381560  
H 6.124644 -1.868451 0.677734  
H 5.574878 -0.669965 1.868131  
H 3.498464 -0.836123 -1.741140  
H 5.186348 -1.362100 -1.689575  
H 4.798780 0.374458 -1.603266  
H -4.546163 1.349476 2.205882  
H -3.802213 3.124417 3.738030  
H -1.616032 4.229565 3.438239  
H -0.138157 3.538441 1.562688  
H -4.671613 0.691311 -1.810590  
H -5.407637 -0.727222 -2.595157  
H -3.645005 -0.468598 -2.662097  
H -5.581526 -2.880199 -0.998279  
H -3.998430 -3.090211 -0.206929  
H -4.074224 -2.850827 -1.941777  
H -5.222188 -1.494476 2.893347  
H -4.852995 -2.980086 1.999907  
H -5.809158 -1.696752 1.236495  
H -1.738097 -1.005252 1.745629  
H -2.503777 -2.282550 2.684037  
H -2.759198 -0.580595 3.141841



Cl -1.372071 1.960728 -2.682774

**1\***

E = -3068.043806

C 0.445151 -0.337476 1.245633

C 0.999561 -1.034566 2.316375

C 0.805802 -0.645993 3.633640

C 0.018754 0.460711 3.904526

C -0.540720 1.170215 2.857155

C -0.313979 0.802429 1.528075

N -0.893236 1.613597 0.521572

C -0.625760 2.907133 0.598343

N -1.548899 3.849638 0.324754

C -1.200889 5.088127 -0.345528

Sb 0.766513 -0.994001 -0.813569

C -0.826699 -2.465623 -0.821987

C -2.147274 -2.146710 -0.492815

C -3.160752 -3.081432 -0.699121

C -2.881569 -4.335430 -1.207663

C -1.580228 -4.659182 -1.553272

C -0.577021 -3.720475 -1.373605

N -2.516412 -0.854724 -0.022725

C -3.352787 -0.770722 0.982451

N -3.383130 -1.669241 2.008007

C -4.642468 -2.181457 2.504532

Pd -1.849451 0.772966 -1.152962

Cl -2.964235 -0.100261 -2.957740

C 2.387679 -2.298235 -0.217385

Cl -0.957012 2.459751 -2.463696

C -2.222738 -2.434249 2.404928  
C -2.953389 3.521835 0.285260  
N -4.241816 0.258942 1.066776  
C -4.651467 0.806065 2.338615  
C -5.023817 0.672725 -0.083589  
N 0.599919 3.358016 0.983995  
C 1.801929 2.617093 0.674032  
C 0.764129 4.476808 1.882068  
H -4.186408 -2.798431 -0.494503  
H -3.685592 -5.042563 -1.368621  
H -1.349526 -5.625151 -1.984220  
H 0.428951 -3.976092 -1.685611  
H -4.943306 1.747941 -0.249203  
H -6.078981 0.431110 0.089660  
H -4.677643 0.167545 -0.982557  
H -4.699269 1.895094 2.260656  
H -3.927379 0.544345 3.107152  
H -5.642427 0.455203 2.649373  
H -3.524994 4.364321 0.682611  
H -3.132177 2.637473 0.889540  
H -3.275194 3.320285 -0.740552  
H -1.728008 5.130276 -1.300260  
H -0.136333 5.113666 -0.555742  
H -1.476708 5.953536 0.263626  
H 1.330601 5.289846 1.417744  
H 1.302267 4.147475 2.777001  
H -0.207325 4.859008 2.185674  
H 2.588355 3.332377 0.427583  
H 1.633957 1.980788 -0.192548

H 2.140129 2.001610 1.513944  
H 1.602718 -1.911781 2.119776  
H 1.254575 -1.214551 4.438502  
H -0.165493 0.770481 4.926024  
H -1.166901 2.032385 3.058843  
H -1.318868 -1.924695 2.093123  
H -2.230225 -3.439261 1.971289  
H -2.216658 -2.515213 3.494344  
H -4.751598 -2.005312 3.578529  
H -4.687858 -3.260225 2.324120  
H -5.477080 -1.719062 1.983791  
C 3.643513 -1.678291 -0.322208  
C 4.797518 -2.411291 -0.023682  
C 4.704289 -3.716007 0.426782  
C 3.462989 -4.314024 0.585952  
C 2.317395 -3.601592 0.258076  
N 3.679763 -0.378123 -0.808467  
H 5.769095 -1.948554 -0.154298  
H 5.607443 -4.269544 0.654310  
H 3.386793 -5.331241 0.948737  
H 1.351535 -4.075988 0.384868  
C 4.500040 0.532796 -0.416265  
N 4.785770 1.561938 -1.273786  
N 5.107654 0.611948 0.825396  
C 5.054669 2.907403 -0.817790  
C 4.337347 1.460480 -2.648097  
C 6.524960 0.866497 0.947962  
C 4.486326 0.026576 1.989296  
H 4.878202 -0.969798 2.221700

H 4.663072 0.679009 2.849232  
H 3.412775 -0.059057 1.838544  
H 7.049963 -0.043456 1.264611  
H 6.936970 1.181350 -0.007740  
H 6.724763 1.646949 1.689113  
H 4.282529 3.589174 -1.188812  
H 5.056254 2.946442 0.268519  
H 6.021821 3.265217 -1.183338  
H 4.955099 2.114606 -3.265994  
H 4.433685 0.435373 -2.994101  
H 3.287926 1.754645 -2.754593

**2\***

E = -3059.5186625

C 0.338890 3.634642 -1.361090

C -0.184885 2.476846 -0.790687

C -1.574881 2.318064 -0.788697

C -2.387187 3.313767 -1.328532

C -1.845760 4.475183 -1.845085

C -0.470964 4.638152 -1.867953

Sb 1.147529 0.853494 -0.250605

C 2.766611 1.991474 0.651729

N -2.194116 1.112478 -0.339680

Pt -1.411737 -0.663082 -1.081508

Cl -1.811337 0.134377 -3.209303

C 0.268072 0.485370 1.709893

C 0.636913 1.243379 2.817712

C 0.057620 1.054349 4.063510

C -0.933868 0.099173 4.215436

C -1.306542 -0.673151 3.130121  
C -0.689857 -0.513943 1.888245  
N -1.077645 -1.394924 0.843559  
C -0.976922 -2.687825 1.114816  
N -1.852995 -3.585258 0.619321  
C -3.147000 -3.171278 0.131625  
C -3.292758 1.192945 0.381603  
N -3.519075 2.168069 1.307480  
C -2.449163 2.854505 1.996072  
N -4.261465 0.251346 0.250436  
C -5.071369 -0.177976 1.366673  
C -4.627028 -0.284751 -1.047156  
N 0.014417 -3.163860 1.912242  
C -0.212073 -4.206553 2.886656  
C 1.304783 -2.507455 1.988509  
Cl -0.442960 -2.592590 -1.937137  
C -4.804290 2.829603 1.387201  
C -1.424360 -4.893030 0.162108  
H -3.456735 3.150907 -1.383708  
H -2.496795 5.230478 -2.267089  
H -0.029381 5.525208 -2.303879  
H 1.412864 3.755995 -1.432532  
H -2.755183 3.023266 3.030672  
H -2.218149 3.817332 1.529776  
H -1.555910 2.242530 1.996016  
H -5.493142 2.418650 0.653645  
H -4.672088 3.893987 1.168983  
H -5.244966 2.732555 2.383357  
H -5.165506 -1.266156 1.339734

H -6.082790 0.242211 1.337701  
H -4.597271 0.108084 2.302923  
H -4.026403 0.172773 -1.829617  
H -5.687302 -0.080813 -1.230966  
H -4.467226 -1.363443 -1.090258  
H -2.081367 -1.424451 3.235628  
H -1.417505 -0.046075 5.173671  
H 0.371632 1.660144 4.904041  
H 1.399690 2.003120 2.710371  
H -3.134307 -3.051242 -0.955287  
H -3.416203 -2.220913 0.583586  
H -3.886240 -3.930083 0.401615  
H -1.938859 -5.689484 0.707241  
H -0.351420 -4.999748 0.288463  
H -1.644177 -4.981871 -0.903441  
H 0.402927 -5.088980 2.686197  
H -1.258129 -4.502439 2.886443  
H 0.042311 -3.828698 3.881918  
H 2.080777 -3.273212 2.050395  
H 1.386009 -1.853483 2.861096  
H 1.484881 -1.919438 1.093706  
C 2.806804 3.328658 1.023730  
C 3.933161 3.877901 1.629549  
C 5.034365 3.069764 1.877713  
C 5.010016 1.727586 1.526011  
C 3.885870 1.184472 0.906284  
H 1.937584 3.957954 0.869434  
H 3.942746 4.922963 1.913538  
H 5.916079 3.480980 2.355143

H 5.860759 1.086419 1.732288  
N 3.800942 -0.181473 0.622043  
C 4.321056 -0.855077 -0.360663  
N 4.170299 -2.260681 -0.295365  
N 5.016655 -0.367308 -1.445969  
C 5.489518 -1.282626 -2.469335  
C 4.936068 1.019158 -1.880330  
C 3.395090 -2.956617 -1.289611  
C 5.056986 -3.013580 0.539546  
H 6.288763 -0.794272 -3.023018  
H 5.894262 -2.189417 -2.027453  
H 4.706502 -1.556742 -3.179624  
H 5.770653 1.221174 -2.548527  
H 4.005971 1.214858 -2.422238  
H 5.002524 1.707002 -1.046718  
H 2.776914 -3.718660 -0.807245  
H 2.709654 -2.272400 -1.789918  
H 4.002473 -3.459689 -2.053450  
H 4.554744 -3.925835 0.869811  
H 5.991314 -3.315414 0.039816  
H 5.312995 -2.429249 1.423646

**BH<sub>3</sub>**

E = -26.6080141

B 0.000000 0.000346 0.000000

H -0.518905 1.074428 0.000000

H 0.259452 -0.538079 1.032984

H 0.259452 -0.538079 -1.032984

### 3 with BH<sub>3</sub>

E = -2961.860198

C -3.848499 -0.791226 -0.924530

C -2.563253 -0.416162 -0.550830

C -2.285836 0.924849 -0.291603

C -3.306232 1.864765 -0.423688

C -4.583621 1.479927 -0.782489

C -4.861240 0.146283 -1.034363

Sb -1.047411 -1.915323 -0.459706

Cl -2.526128 -3.579840 0.390880

N -0.977600 1.362037 0.029365

Pd 0.550605 0.711401 -1.237914

Cl 2.183059 0.027131 -2.699005

C -0.127001 -1.470027 1.426828

C -0.656540 -1.996951 2.600761

C -0.095213 -1.719524 3.836563

C 1.010968 -0.888742 3.907185

C 1.551106 -0.364040 2.747928

C 1.012596 -0.662848 1.492747

N 1.643852 -0.113903 0.355422

C 2.962064 -0.303088 0.286745

N 3.515360 -1.493151 0.621800

C 4.757215 -1.593950 1.355717

N 3.804211 0.674092 -0.089912

C 3.388246 2.055588 -0.095886

C 4.991640 0.398289 -0.878570

C -0.835132 2.276160 0.965561

N 0.135811 3.221994 0.871571

C 0.386500 3.925372 -0.374602



N -1.617555 2.323585 2.077291  
C -2.264299 1.151061 2.624508  
C -2.133893 3.583837 2.571152  
Cl -0.628088 1.613540 -2.979062  
C 0.793549 3.758660 2.041389  
C 2.802887 -2.736621 0.405900  
H -3.077234 2.913626 -0.280671  
H -5.357446 2.229176 -0.891891  
H -5.854422 -0.162807 -1.332026  
H -4.069771 -1.831668 -1.124853  
H 1.436356 3.858691 -0.661442  
H 0.131731 4.983024 -0.246724  
H -0.211529 3.503243 -1.178855  
H 1.860570 3.862995 1.832315  
H 0.668908 3.081085 2.883237  
H 0.414318 4.747730 2.320279  
H 4.223905 2.680134 0.228812  
H 2.549096 2.181473 0.581699  
H 3.083468 2.356884 -1.101946  
H 4.925150 0.957989 -1.812596  
H 5.036239 -0.656581 -1.130208  
H 5.898270 0.689810 -0.341806  
H 5.537910 -2.086402 0.769479  
H 4.586462 -2.178902 2.264116  
H 5.105501 -0.604722 1.642704  
H 3.526057 -3.499654 0.114294  
H 2.095590 -2.620240 -0.411602  
H 2.278645 -3.074307 1.304844  
H -1.527300 -2.637160 2.549972

H -0.525950 -2.143564 4.734128  
H 1.454487 -0.645410 4.864834  
H 2.411852 0.293100 2.799488  
H -1.729886 0.258614 2.321601  
H -3.305438 1.071083 2.297588  
H -2.236578 1.217106 3.714039  
H -1.814735 3.774451 3.599396  
H -3.227262 3.553465 2.547802  
H -1.807137 4.406084 1.939865  
B -0.026484 -3.211122 -2.080316  
H 0.838328 -2.518657 -2.528350  
H 0.296105 -4.096383 -1.322140  
H -0.986693 -3.437014 -2.769876

#### **4 with BH<sub>3</sub>**

E = -2953.3423058  
C 3.912028 -0.767107 -0.828601  
C 2.616828 -0.412809 -0.472776  
C 2.328488 0.916038 -0.172658  
C 3.342574 1.867878 -0.251347  
C 4.630078 1.502968 -0.595828  
C 4.920820 0.180083 -0.885320  
Sb 1.079882 -1.897502 -0.471962  
Cl 2.601428 -3.599556 0.306423  
N 1.006774 1.333670 0.136693  
Pt -0.510473 0.619527 -1.095174  
Cl 0.642289 1.508817 -2.875393  
C 0.208477 -1.570029 1.467614  
C 0.769220 -2.147466 2.602353

C 0.238432 -1.928555 3.863612  
C -0.867834 -1.106560 4.002928  
C -1.439546 -0.530836 2.883483  
C -0.929461 -0.772640 1.605964  
N -1.588966 -0.174407 0.506281  
C -2.910254 -0.364722 0.454816  
N -3.761392 0.618725 0.115689  
C -3.356554 2.002957 0.143089  
C 0.850907 2.250213 1.074448  
N 1.609377 2.275919 2.201148  
C 2.220508 1.084852 2.750479  
N -0.097106 3.213202 0.960891  
C -0.765373 3.768623 2.116183  
C -0.341889 3.892518 -0.299882  
N -3.448868 -1.564910 0.767671  
C -4.676063 -1.694711 1.521138  
C -2.738559 -2.798102 0.488231  
Cl -2.180439 -0.087613 -2.518463  
C 2.145929 3.521170 2.711333  
C -4.957345 0.355122 -0.663702  
H 3.104853 2.910474 -0.078945  
H 5.400911 2.260126 -0.664523  
H 5.922149 -0.113095 -1.171790  
H 4.142304 -1.799344 -1.057249  
H 2.176851 1.144488 3.839646  
H 3.264615 0.984617 2.439201  
H 1.672310 0.206421 2.431236  
H 1.849815 4.353862 2.078584  
H 3.238472 3.464498 2.707157

H 1.812596 3.713645 3.734546  
H -1.825366 3.895656 1.886462  
H -0.369219 4.749860 2.397903  
H -0.670474 3.092295 2.962941  
H 0.292032 3.484856 -1.083296  
H -0.127691 4.958923 -0.175229  
H -1.380468 3.783705 -0.613879  
H -2.299758 0.121030 2.986147  
H -1.285447 -0.908726 4.982396  
H 0.694330 -2.390768 4.729435  
H 1.640341 -2.780334 2.498122  
H -3.086334 2.341012 -0.860966  
H -2.497090 2.114054 0.796853  
H -4.186440 2.609593 0.513566  
H -5.857839 0.635782 -0.111262  
H -5.003313 -0.695157 -0.933307  
H -4.903012 0.931450 -1.588611  
H -5.463820 -2.176046 0.935282  
H -5.025210 -0.716143 1.841841  
H -4.484606 -2.303796 2.409231  
H -3.467451 -3.550725 0.184463  
H -2.192892 -3.167129 1.361275  
H -2.050610 -2.649225 -0.340704  
B 0.075353 -3.250347 -2.075883  
H -0.802628 -2.583530 -2.534603  
H 1.037630 -3.476684 -2.761575  
H -0.226308 -4.121123 -1.292823

**SbAr<sub>3</sub> ligand**

E = -2019.542638  
C 1.183746 1.336439 1.182351  
C 0.204266 0.366397 0.952864  
C -0.375952 -0.277188 2.035681  
C 0.005641 0.023389 3.335127  
C 0.992650 0.973198 3.559051  
C 1.585205 1.622356 2.490008  
Sb -0.400714 0.122687 -1.097524  
C 1.343510 -0.830991 -1.921415  
C 1.785710 -0.392266 -3.164060  
C 2.913405 -0.928980 -3.769794  
C 3.612862 -1.933233 -3.117535  
C 3.194831 -2.382913 -1.877731  
C 2.068740 -1.831564 -1.254557  
N 1.591499 -2.305221 -0.046513  
C 2.299687 -2.494815 1.004602  
N 1.789293 -3.307860 1.993564  
C 1.908779 -2.938166 3.390229  
N 1.817524 1.905408 0.079316  
C 1.981088 3.166252 -0.089695  
N 1.238350 4.173066 0.495030  
C -0.125274 3.948967 0.914052  
C -1.633072 -1.616615 -0.824049  
C -2.858545 -1.378945 -0.189529  
C -3.740251 -2.439759 0.031887  
C -3.423886 -3.711685 -0.415142  
C -2.228596 -3.942632 -1.080972  
C -1.339556 -2.894569 -1.277193  
N -3.087210 -0.093236 0.297468

C -4.193196 0.547267 0.193927  
N -5.193378 0.318331 -0.728494  
C -4.904398 -0.267219 -2.016201  
N 3.538552 -1.950231 1.277848  
C 3.974663 -0.700366 0.704967  
C 4.571866 -2.710195 1.938817  
N -4.421774 1.600269 1.058739  
C -3.495161 1.750761 2.161900  
C -4.922122 2.859436 0.543377  
N 2.967625 3.590838 -0.955069  
C 2.677954 4.623120 -1.931331  
C 3.902101 2.586382 -1.423321  
C 0.600332 -4.069389 1.675661  
C 1.862366 5.364135 1.021753  
C -6.589150 0.352298 -0.360562  
H -4.668762 -2.258392 0.561586  
H -4.113691 -4.528335 -0.237896  
H -1.981281 -4.937663 -1.429425  
H -0.392203 -3.082496 -1.767178  
H -5.571451 3.338145 1.279722  
H -5.488186 2.702548 -0.370222  
H -4.094486 3.544623 0.318315  
H -3.307548 0.787427 2.628256  
H -3.934719 2.431200 2.893520  
H -2.526558 2.148918 1.837025  
H -7.025185 -0.651473 -0.432358  
H -7.159707 1.014448 -1.020850  
H -6.697635 0.702754 0.662842  
H -3.857633 -0.115749 -2.269444

H -5.519230 0.228462 -2.772935  
H -5.111236 -1.342357 -2.046426  
H 2.369696 2.352643 2.654181  
H 1.306596 1.205335 4.569876  
H -0.457457 -0.488748 4.169799  
H -1.139444 -1.025369 1.863860  
H 4.261455 1.994471 -0.585144  
H 4.746597 3.093951 -1.892601  
H 3.446827 1.899232 -2.145354  
H 3.560680 5.244577 -2.097456  
H 1.865493 5.257127 -1.588137  
H 2.383756 4.179914 -2.890813  
H 1.788816 5.380834 2.115959  
H 1.379741 6.269135 0.637423  
H 2.913928 5.387208 0.746803  
H -0.568938 3.144302 0.331096  
H -0.700115 4.861650 0.732512  
H -0.205881 3.690337 1.975787  
H 3.736777 -3.174211 -1.372494  
H 4.487856 -2.375001 -3.579724  
H 3.234030 -0.576772 -4.742155  
H 1.237089 0.391854 -3.677349  
H 0.693922 -4.515936 0.689094  
H -0.299305 -3.443438 1.668597  
H 0.483867 -4.858291 2.421253  
H 2.311989 -3.763692 3.984788  
H 0.928168 -2.667626 3.792134  
H 2.555104 -2.071450 3.500651  
H 4.918672 -2.212058 2.851361

H 5.434552 -2.826557 1.271747  
H 4.205522 -3.699380 2.201110  
H 4.423810 -0.085250 1.491859  
H 3.139495 -0.148747 0.285357  
H 4.717779 -0.852140 -0.087037

**SbAr<sub>2</sub>Cl ligand**

E = -1886.7353945

C 3.384624 -2.354795 -0.249172  
C 2.468521 -1.346772 -0.485762  
C 2.891778 -0.022150 -0.624725  
C 4.249346 0.283475 -0.577901  
C 5.161670 -0.736571 -0.349494  
C 4.738747 -2.047009 -0.171841  
Sb 0.366046 -1.380550 -0.879645  
Cl 0.067177 -3.669982 -0.085326  
N 1.837249 0.855909 -0.881263  
C -0.223253 -0.532567 1.004663  
C 0.479258 -0.765090 2.179073  
C 0.104424 -0.163644 3.371517  
C -0.987013 0.692825 3.385695  
C -1.711637 0.917224 2.227766  
C -1.355958 0.286623 1.032060  
N -2.084488 0.512617 -0.140514  
C -3.346300 0.256109 -0.194842  
N -4.113219 0.856681 -1.168019  
C -3.537451 1.941282 -1.926964  
C 1.710297 2.058642 -0.427570  
N 2.432941 2.617368 0.596332



C 2.887694 1.850690 1.731855  
N 0.764963 2.873403 -0.999323  
C -0.141230 3.623281 -0.146212  
C 0.162007 2.439579 -2.243837  
N -4.038852 -0.601101 0.634691  
C -5.311746 -0.224909 1.205987  
C -3.408287 -1.754903 1.239006  
C 2.823896 4.007275 0.591886  
C -5.123040 0.104038 -1.885600  
H 4.586163 1.303183 -0.720826  
H 6.219255 -0.504478 -0.312301  
H 5.464281 -2.829846 0.009656  
H 3.045396 -3.377725 -0.131754  
H 2.580697 2.358821 2.651142  
H 3.976462 1.737613 1.739264  
H 2.436136 0.864375 1.728724  
H 2.529987 4.476524 -0.343439  
H 3.911466 4.082811 0.695773  
H 2.369602 4.561221 1.421189  
H -1.085543 3.079722 -0.037310  
H -0.341944 4.606834 -0.577376  
H 0.281638 3.753869 0.845250  
H 0.924981 2.040963 -2.907491  
H -0.310358 3.303794 -2.715620  
H -0.595633 1.668742 -2.071430  
H -2.571395 1.577609 2.237750  
H -1.281971 1.183048 4.305766  
H 0.664272 -0.354302 4.278338  
H 1.337799 -1.428003 2.161802

H -2.882329 1.580848 -2.728716  
H -2.949642 2.582085 -1.275295  
H -4.345559 2.524486 -2.372922  
H -6.032584 0.698062 -2.005145  
H -5.368146 -0.807834 -1.349510  
H -4.760125 -0.172334 -2.882429  
H -6.070328 -0.994511 1.029215  
H -5.657620 0.709828 0.771408  
H -5.214329 -0.088676 2.289593  
H -4.149545 -2.555200 1.304500  
H -3.023836 -1.551998 2.243900  
H -2.585837 -2.111746 0.623879

**SbAr<sub>3</sub>ligand with BH<sub>3</sub>**

E = -2046.202253

C 1.005613 1.378363 1.375845  
C 0.215896 0.244959 1.169075  
C -0.201639 -0.521310 2.244185  
C 0.168974 -0.176822 3.535706  
C 0.965988 0.941046 3.745337  
C 1.387779 1.714000 2.676919  
Sb -0.367530 -0.087602 -0.841923  
C 1.388373 -0.565421 -1.923832  
C 1.614322 0.025456 -3.159230  
C 2.765740 -0.259130 -3.879450  
C 3.693444 -1.146145 -3.351143  
C 3.481902 -1.738014 -2.117928  
C 2.330550 -1.446716 -1.379321  
N 2.023621 -2.052050 -0.173994

|   |           |           |           |
|---|-----------|-----------|-----------|
| C | 2.824990  | -2.157145 | 0.824803  |
| N | 2.524870  | -3.079132 | 1.800767  |
| C | 2.666998  | -2.741748 | 3.204229  |
| N | 1.464671  | 2.049439  | 0.251306  |
| C | 1.322308  | 3.308220  | 0.029678  |
| N | 0.418739  | 4.142509  | 0.642747  |
| C | -0.845725 | 3.656257  | 1.144412  |
| C | -1.378711 | -1.946415 | -0.733951 |
| C | -2.621782 | -1.877080 | -0.094646 |
| C | -3.398296 | -3.032417 | 0.011442  |
| C | -2.944595 | -4.222606 | -0.532870 |
| C | -1.718574 | -4.284239 | -1.181581 |
| C | -0.937094 | -3.141133 | -1.278992 |
| N | -2.950937 | -0.664249 | 0.494296  |
| C | -4.060611 | -0.033882 | 0.341972  |
| N | -4.979822 | -0.233824 | -0.657889 |
| C | -4.587781 | -0.707070 | -1.966115 |
| N | 3.966320  | -1.417931 | 1.044600  |
| C | 4.133283  | -0.081405 | 0.525380  |
| C | 5.155255  | -2.006428 | 1.613998  |
| N | -4.369399 | 0.963706  | 1.243872  |
| C | -3.543222 | 1.050753  | 2.430178  |
| C | -4.803019 | 2.257427  | 0.747032  |
| N | 2.125010  | 3.898255  | -0.920790 |
| C | 1.522201  | 4.746340  | -1.934353 |
| C | 3.249880  | 3.122906  | -1.403702 |
| C | 1.470448  | -4.029517 | 1.517825  |
| C | 0.742511  | 5.509016  | 0.977903  |
| C | -6.401290 | -0.142914 | -0.423740 |

|   |           |           |           |
|---|-----------|-----------|-----------|
| H | -4.350795 | -2.987344 | 0.526223  |
| H | -3.553626 | -5.114532 | -0.445441 |
| H | -1.369509 | -5.219174 | -1.600945 |
| H | 0.029421  | -3.185453 | -1.766004 |
| H | -5.534545 | 2.698007  | 1.428280  |
| H | -5.250713 | 2.161167  | -0.237409 |
| H | -3.949485 | 2.939771  | 0.657275  |
| H | -3.402910 | 0.063447  | 2.862703  |
| H | -4.045201 | 1.695391  | 3.154019  |
| H | -2.549962 | 1.459834  | 2.213226  |
| H | -6.879013 | -1.102095 | -0.652612 |
| H | -6.866530 | 0.622518  | -1.054827 |
| H | -6.594273 | 0.099920  | 0.618166  |
| H | -3.543681 | -0.471646 | -2.153815 |
| H | -5.184820 | -0.183074 | -2.716794 |
| H | -4.739044 | -1.784979 | -2.086189 |
| H | 2.018175  | 2.581059  | 2.835719  |
| H | 1.263411  | 1.212188  | 4.751369  |
| H | -0.159504 | -0.777645 | 4.374568  |
| H | -0.830973 | -1.386167 | 2.074348  |
| H | 3.794297  | 2.695632  | -0.564755 |
| H | 3.913662  | 3.789408  | -1.957052 |
| H | 2.937214  | 2.301967  | -2.058251 |
| H | 2.183226  | 5.583256  | -2.171434 |
| H | 0.568722  | 5.135263  | -1.589758 |
| H | 1.335651  | 4.174503  | -2.850012 |
| H | 0.659615  | 5.657492  | 2.060325  |
| H | 0.064375  | 6.216539  | 0.488091  |
| H | 1.761088  | 5.736943  | 0.674461  |

|   |           |           |           |
|---|-----------|-----------|-----------|
| H | -1.151845 | 2.768706  | 0.596662  |
| H | -1.604132 | 4.424854  | 0.972896  |
| H | -0.815850 | 3.426510  | 2.215235  |
| H | 4.205095  | -2.436382 | -1.713247 |
| H | 4.591016  | -1.385006 | -3.909270 |
| H | 2.932563  | 0.198139  | -4.846249 |
| H | 0.883405  | 0.718675  | -3.561899 |
| H | 1.577928  | -4.419168 | 0.508827  |
| H | 0.476512  | -3.574246 | 1.592745  |
| H | 1.543312  | -4.851139 | 2.232649  |
| H | 3.228607  | -3.512475 | 3.740099  |
| H | 1.681153  | -2.642942 | 3.667686  |
| H | 3.175849  | -1.788262 | 3.316898  |
| H | 5.457364  | -1.496673 | 2.535691  |
| H | 5.984840  | -1.931284 | 0.901446  |
| H | 4.987708  | -3.057102 | 1.836653  |
| H | 4.550021  | 0.553677  | 1.313652  |
| H | 3.181751  | 0.345891  | 0.222830  |
| H | 4.810915  | -0.058067 | -0.335931 |
| B | -1.473521 | 1.561511  | -1.913078 |
| H | -0.651699 | 2.441973  | -2.034903 |
| H | -1.792152 | 1.044556  | -2.962303 |
| H | -2.411201 | 1.847567  | -1.204980 |

**SbAr<sub>2</sub>Cl ligand with BH<sub>3</sub>**

E = -1913.365942

|   |           |           |          |
|---|-----------|-----------|----------|
| C | -0.123961 | -0.289417 | 2.665357 |
| C | 0.645269  | -0.565127 | 1.545897 |
| C | 1.984425  | -0.173421 | 1.474725 |

|    |           |           |           |
|----|-----------|-----------|-----------|
| C  | 2.543643  | 0.499290  | 2.566006  |
| C  | 1.772550  | 0.766070  | 3.683203  |
| C  | 0.439920  | 0.374782  | 3.742536  |
| Sb | -0.022251 | -1.671422 | -0.118796 |
| B  | 0.672835  | -3.763640 | -0.587474 |
| N  | 2.680041  | -0.562153 | 0.344691  |
| C  | 3.497771  | 0.186394  | -0.312660 |
| N  | 3.535375  | 1.562725  | -0.280583 |
| C  | 2.351216  | 2.349467  | -0.033970 |
| C  | -2.124837 | -1.635707 | 0.120012  |
| C  | -2.823677 | -0.432615 | 0.306948  |
| C  | -4.206725 | -0.491213 | 0.509577  |
| C  | -4.871319 | -1.704539 | 0.494072  |
| C  | -4.181277 | -2.889224 | 0.279299  |
| C  | -2.808272 | -2.847056 | 0.092739  |
| N  | -2.103466 | 0.743523  | 0.378459  |
| C  | -2.415959 | 1.841097  | -0.210761 |
| N  | -1.861350 | 3.013540  | 0.258874  |
| C  | -1.182173 | 2.955992  | 1.536683  |
| Cl | 0.217918  | -0.171036 | -1.947663 |
| N  | -3.241617 | 1.979051  | -1.303298 |
| C  | -4.157730 | 3.088884  | -1.431037 |
| C  | -3.429302 | 0.911349  | -2.258266 |
| N  | 4.404533  | -0.412389 | -1.147188 |
| C  | 4.646444  | 0.119461  | -2.475044 |
| C  | 4.563766  | -1.849942 | -1.049037 |
| C  | 4.780528  | 2.294155  | -0.283660 |
| C  | -1.272879 | 3.955577  | -0.673610 |
| H  | -4.750937 | 0.429457  | 0.684034  |

|   |           |           |           |
|---|-----------|-----------|-----------|
| H | -5.942800 | -1.725564 | 0.653451  |
| H | -4.704911 | -3.835913 | 0.265323  |
| H | -2.261173 | -3.768763 | -0.072611 |
| H | -3.461720 | 1.342459  | -3.262513 |
| H | -4.358104 | 0.356686  | -2.086932 |
| H | -2.594617 | 0.217014  | -2.215454 |
| H | -4.036432 | 3.774340  | -0.596265 |
| H | -5.190746 | 2.722537  | -1.433459 |
| H | -3.994889 | 3.638579  | -2.364373 |
| H | -0.188284 | 3.806139  | -0.739655 |
| H | -1.459088 | 4.981529  | -0.347852 |
| H | -1.689488 | 3.823140  | -1.667744 |
| H | -1.778741 | 2.396963  | 2.252776  |
| H | -1.042529 | 3.975560  | 1.900484  |
| H | -0.206264 | 2.462820  | 1.467052  |
| H | 3.585334  | 0.794961  | 2.532319  |
| H | 2.218606  | 1.281668  | 4.525248  |
| H | -0.152556 | 0.584976  | 4.623395  |
| H | -1.167015 | -0.579550 | 2.692287  |
| H | 3.747074  | -2.384836 | -1.544314 |
| H | 4.575076  | -2.153103 | -0.005651 |
| H | 5.509897  | -2.125115 | -1.518243 |
| H | 5.714067  | 0.104081  | -2.707014 |
| H | 4.285004  | 1.140787  | -2.550303 |
| H | 4.120270  | -0.481748 | -3.224229 |
| H | 4.836329  | 2.993371  | -1.125126 |
| H | 5.619301  | 1.605629  | -0.347633 |
| H | 4.876035  | 2.873119  | 0.642056  |
| H | 2.350008  | 3.205713  | -0.715609 |

H 2.304141 2.724923 0.994436  
H 1.459458 1.759235 -0.231835  
H -0.020616 -4.054022 -1.531761  
H 1.854352 -3.682686 -0.785119  
H 0.352838 -4.291659 0.456302

**PPh<sub>3</sub>**

E = -1036.3108731

P -0.000000 -0.000000 1.250387

C 1.571348 -0.478673 0.435757

C -0.371131 1.600163 0.435757

C -1.200216 -1.121491 0.435757

C -1.178960 1.742362 -0.688955

C -1.396993 2.993795 -1.246656

C -0.805156 4.118152 -0.692890

C -0.000000 3.988796 0.429464

C 0.205898 2.740655 0.993585

H -1.642228 0.871223 -1.134750

H -2.030321 3.088229 -2.119996

H -0.975212 5.093834 -1.130480

H 0.460571 4.862997 0.872266

H 0.824674 2.647672 1.879191

C 2.270528 -1.548640 0.993585

C 3.454399 -1.994398 0.429464

C 3.969002 -1.361790 -0.692890

C 3.291199 -0.287066 -1.246656

C 2.098410 0.149828 -0.688955

H 1.880614 -2.038025 1.879191

H 3.981194 -2.830364 0.872266

H 4.898996 -1.702359 -1.130480



H 3.689646 0.214195 -2.119996  
H 1.575616 0.986600 -1.134750  
C -2.476426 -1.192015 0.993585  
C -3.454399 -1.994398 0.429464  
C -3.163846 -2.756361 -0.692890  
C -1.894206 -2.706729 -1.246656  
C -0.919450 -1.892190 -0.688955  
H -2.705288 -0.609647 1.879191  
H -4.441764 -2.032633 0.872266  
H -3.923784 -3.391475 -1.130480  
H -1.659324 -3.302425 -2.119996  
H 0.066613 -1.857823 -1.134750

**PPh<sub>3</sub> with BH<sub>3</sub>**

E = -1062.98111862  
P 0.000000 -0.000000 0.959208  
C -1.575216 -0.538612 0.236743  
C 1.254060 -1.094871 0.236743  
C 0.321156 1.633483 0.236743  
C 1.946046 -0.775379 -0.927472  
C 2.875662 -1.660265 -1.451804  
C 3.119567 -2.868388 -0.817428  
C 2.437147 -3.189434 0.346856  
C 1.510473 -2.306241 0.875345  
H 1.765964 0.169716 -1.424219  
H 3.412338 -1.402279 -2.355887  
H 3.847347 -3.557784 -1.226553  
H 2.632042 -4.127757 0.850128  
H 0.989041 -2.548831 1.792707

C -2.752500 -0.154987 0.875345  
C -3.980704 -0.515914 0.346856  
C -4.043880 -1.267430 -0.817428  
C -2.875662 -1.660265 -1.451804  
C -1.644521 -1.297636 -0.927472  
H -2.701873 0.417881 1.792707  
H -4.890764 -0.215537 0.850128  
H -5.004805 -1.553008 -1.226553  
H -2.920578 -2.254032 -2.355887  
H -0.736003 -1.614228 -1.424219  
C 1.242027 2.461228 0.875345  
C 1.543557 3.705348 0.346856  
C 0.924314 4.135818 -0.817428  
C -0.000000 3.320529 -1.451804  
C -0.301525 2.073015 -0.927472  
H 1.712832 2.130950 1.792707  
H 2.258721 4.343294 0.850128  
H 1.157458 5.110792 -1.226553  
H -0.491760 3.656311 -2.355887  
H -1.029961 1.444512 -1.424219  
B 0.000000 -0.000000 2.878455  
H 1.129791 0.299259 3.196907  
H -0.824061 0.828798 3.196907  
H -0.305729 -1.128057 3.196907

## 5) References

- [S1] C. Manankandayalage, D. K. Unmruh and C. Krempner, *Chem. Eur. J.*, 2021, **27**, 6263.
- [S2] G.M. Sheldrick, *Acta Cryst.*, 2015, **A71**, 3.
- [S3] Gaussian 16, Revision C.01, M. J. Frisch, G. W. Trucks, H. B. Schlegel, G. E. Scuseria, M. A. Robb, J. R. Cheeseman, G. Scalmani, V. Barone, G. A. Petersson, H. Nakatsuji, X. Li, M. Caricato, A. V. Marenich, J. Bloino, B. G. Janesko, R. Gomperts, B. Mennucci, H. P. Hratchian, J. V. Ortiz, A. F. Izmaylov, J. L. Sonnenberg, D. Williams-Young, F. Ding, F. Lipparini, F. Egidi, J. Goings, B. Peng, A. Petrone, T. Henderson, D. Ranasinghe, V. G. Zakrzewski, J. Gao, N. Rega, G. Zheng, W. Liang, M. Hada, M. Ehara, K. Toyota, R. Fukuda, J. Hasegawa, M. Ishida, T. Nakajima, Y. Honda, O. Kitao, H. Nakai, T. Vreven, K. Throssell, J. A. Montgomery, Jr., J. E. Peralta, F. Ogliaro, M. J. Bearpark, J. J. Heyd, E. N. Brothers, K. N. Kudin, V. N. Staroverov, T. A. Keith, R. Kobayashi, J. Normand, K. Raghavachari, A. P. Rendell, J. C. Burant, S. S. Iyengar, J. Tomasi, M. Cossi, J. M. Millam, M. Klene, C. Adamo, R. Cammi, J. W. Ochterski, R. L. Martin, K. Morokuma, O. Farkas, J. B. Foresman, and D. J. Fox, Gaussian, 2016, *Inc.*, Wallingford CT.
- [S4] E. D. Glendening, J. K. Badenhoop, A. E. Reed, J. E. Carpenter, J. A. Bohmann, C. M. Morales, P. Karafiloglou, C. R. Landis, and F. Weinhold, NBO 7.0., 2018, Theoretical Chemistry Institute, University of Wisconsin, Madison.
- [S5] T. Lu, F. Chen, *J. Comput. Chem.*, 2021, **33**, 580-592.
